# Supplementary material for: Push–pull effect – how to effectively control photoinduced intramolecular charge transfer processes in rhenium(i) chromophores with ligands of D–A or D–π–A structure
Source: Royal Society of Chemistry journal article supplement (doi:10.1039/d4dt03237c), 2025-01-01
Supplement: d4dt03237c1.pdf [file d4dt03237c1.pdf]

## ELECTRONIC SUPPLEMENTARY MATERIAL

### **Push-pull effect – how to effectively control photoinduced intramolecular charge transfer processes in rhenium(I) chromophores with ligands of D–A or D– $\pi$ –A structure**

Katarzyna Choroba<sup>\*</sup>, Joanna Palion-Gazda, Anna Kryczka, Ewa Malicka, and Barbara Machura<sup>\*</sup>

*Institute of Chemistry, Faculty of Science and Technology, University of Silesia, Szkolna 9, 40-006 Katowice, Poland*

#### **Table of contents**

|                                                                                                                                                                                                                        |    |
|------------------------------------------------------------------------------------------------------------------------------------------------------------------------------------------------------------------------|----|
| Computational Details.....                                                                                                                                                                                             | 2  |
| Figure S1. Electron density plots of the frontier molecular orbitals for complexes 1–6. Calculated with the Gaussian-16 software (PBE1PBE/def2-TZVPD/def2-TZVP/PCM/acetonitrile). .....                                | 4  |
| Figure S2. Percentage contribution of selected molecular fragments to the frontier molecular orbitals for complexes 1–6. Calculated with the Gaussian-16 software (PBE1PBE/def2-TZVPD/def2-TZVP/PCM/acetonitrile)..... | 6  |
| Table S1. The relevant electrochemical data of 1–6. ....                                                                                                                                                               | 7  |
| Table S2. The absorption and emission properties of complexes 1–6. ....                                                                                                                                                | 8  |
| Table S3. The spectroscopic and electrochemical properties of complexes 7–46. ....                                                                                                                                     | 10 |
| Table S4. The spectroscopic and electrochemical properties of complexes 47–58. ....                                                                                                                                    | 13 |
| Table S5. The spectroscopic and electrochemical properties of complexes 59–71. ....                                                                                                                                    | 15 |
| Table S6. The spectroscopic and electrochemical properties of complexes 72–86. ....                                                                                                                                    | 16 |
| Supplementary References.....                                                                                                                                                                                          | 17 |

## Computational Details

Theoretical DFT and TD-DFT calculations of **1–6** have been performed using the GAUSSIAN-16 (C.01) program package<sup>1</sup> with the PBE1PBE hybrid exchange-correlation functional<sup>2,3</sup>, and the def2-TZVPD basis set for rhenium and def2-TZVP basis set for other elements<sup>4-6</sup>. For all compounds, X-ray structural parameters were used as a starting point for the singlet ground-state optimization. After optimization of the singlet geometry, vibrational frequencies were calculated to verify the minimum on the potential energy surface. All the further calculations were obtained based on the optimized geometries. Absorption properties were calculated by the TD-DFT method. In all calculations, the polarizable continuum model (PCM) correction was used to simulate the acetonitrile solvent environment for all calculations<sup>7-9</sup>. The calculations have been carried out using resources provided by Wroclaw Centre for Networking and Supercomputing (<http://wcss.pl>).

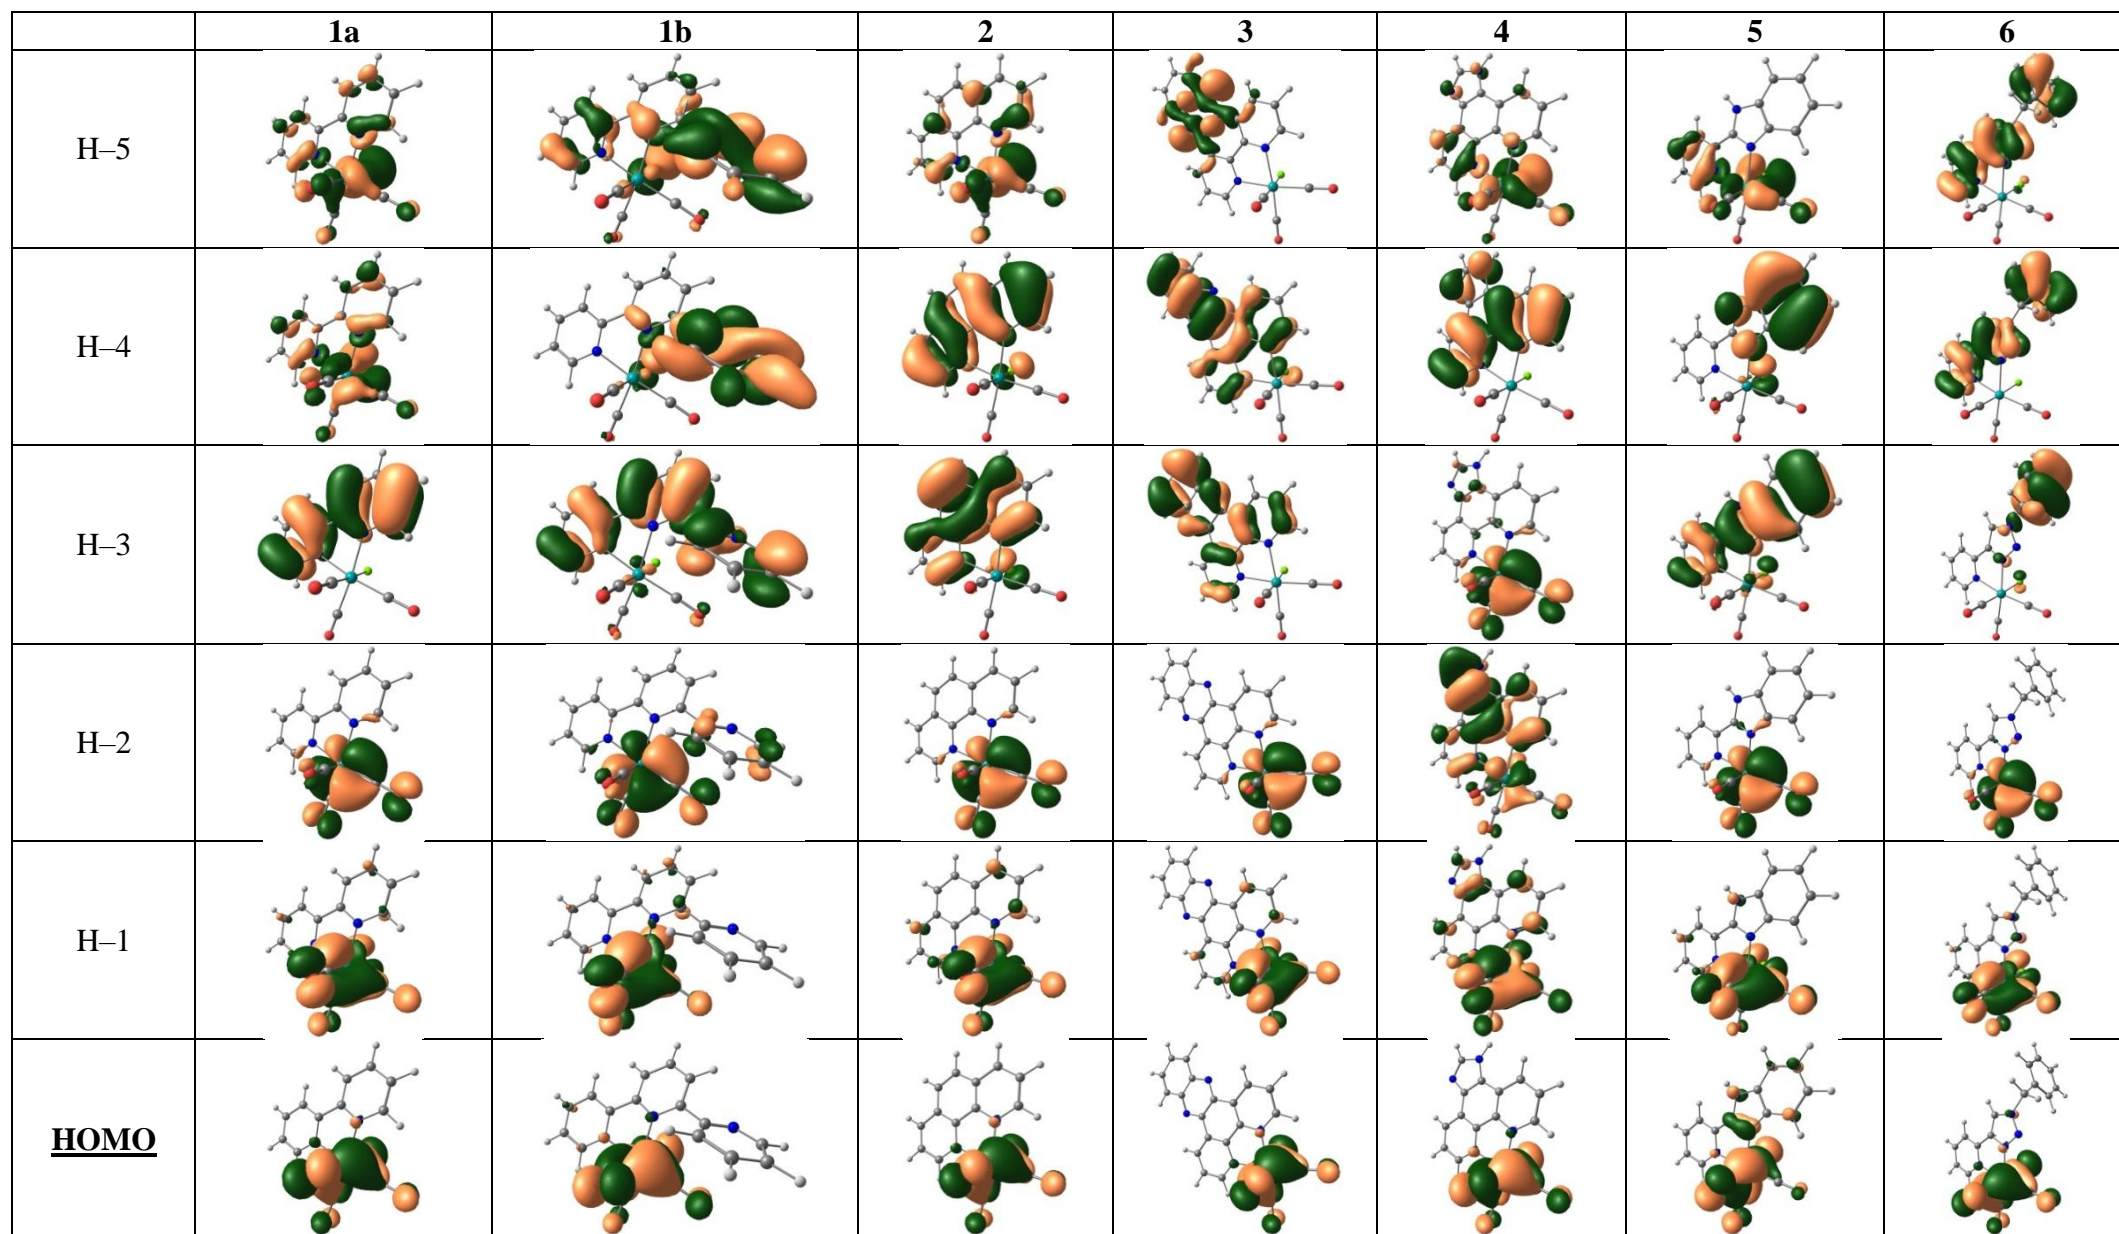

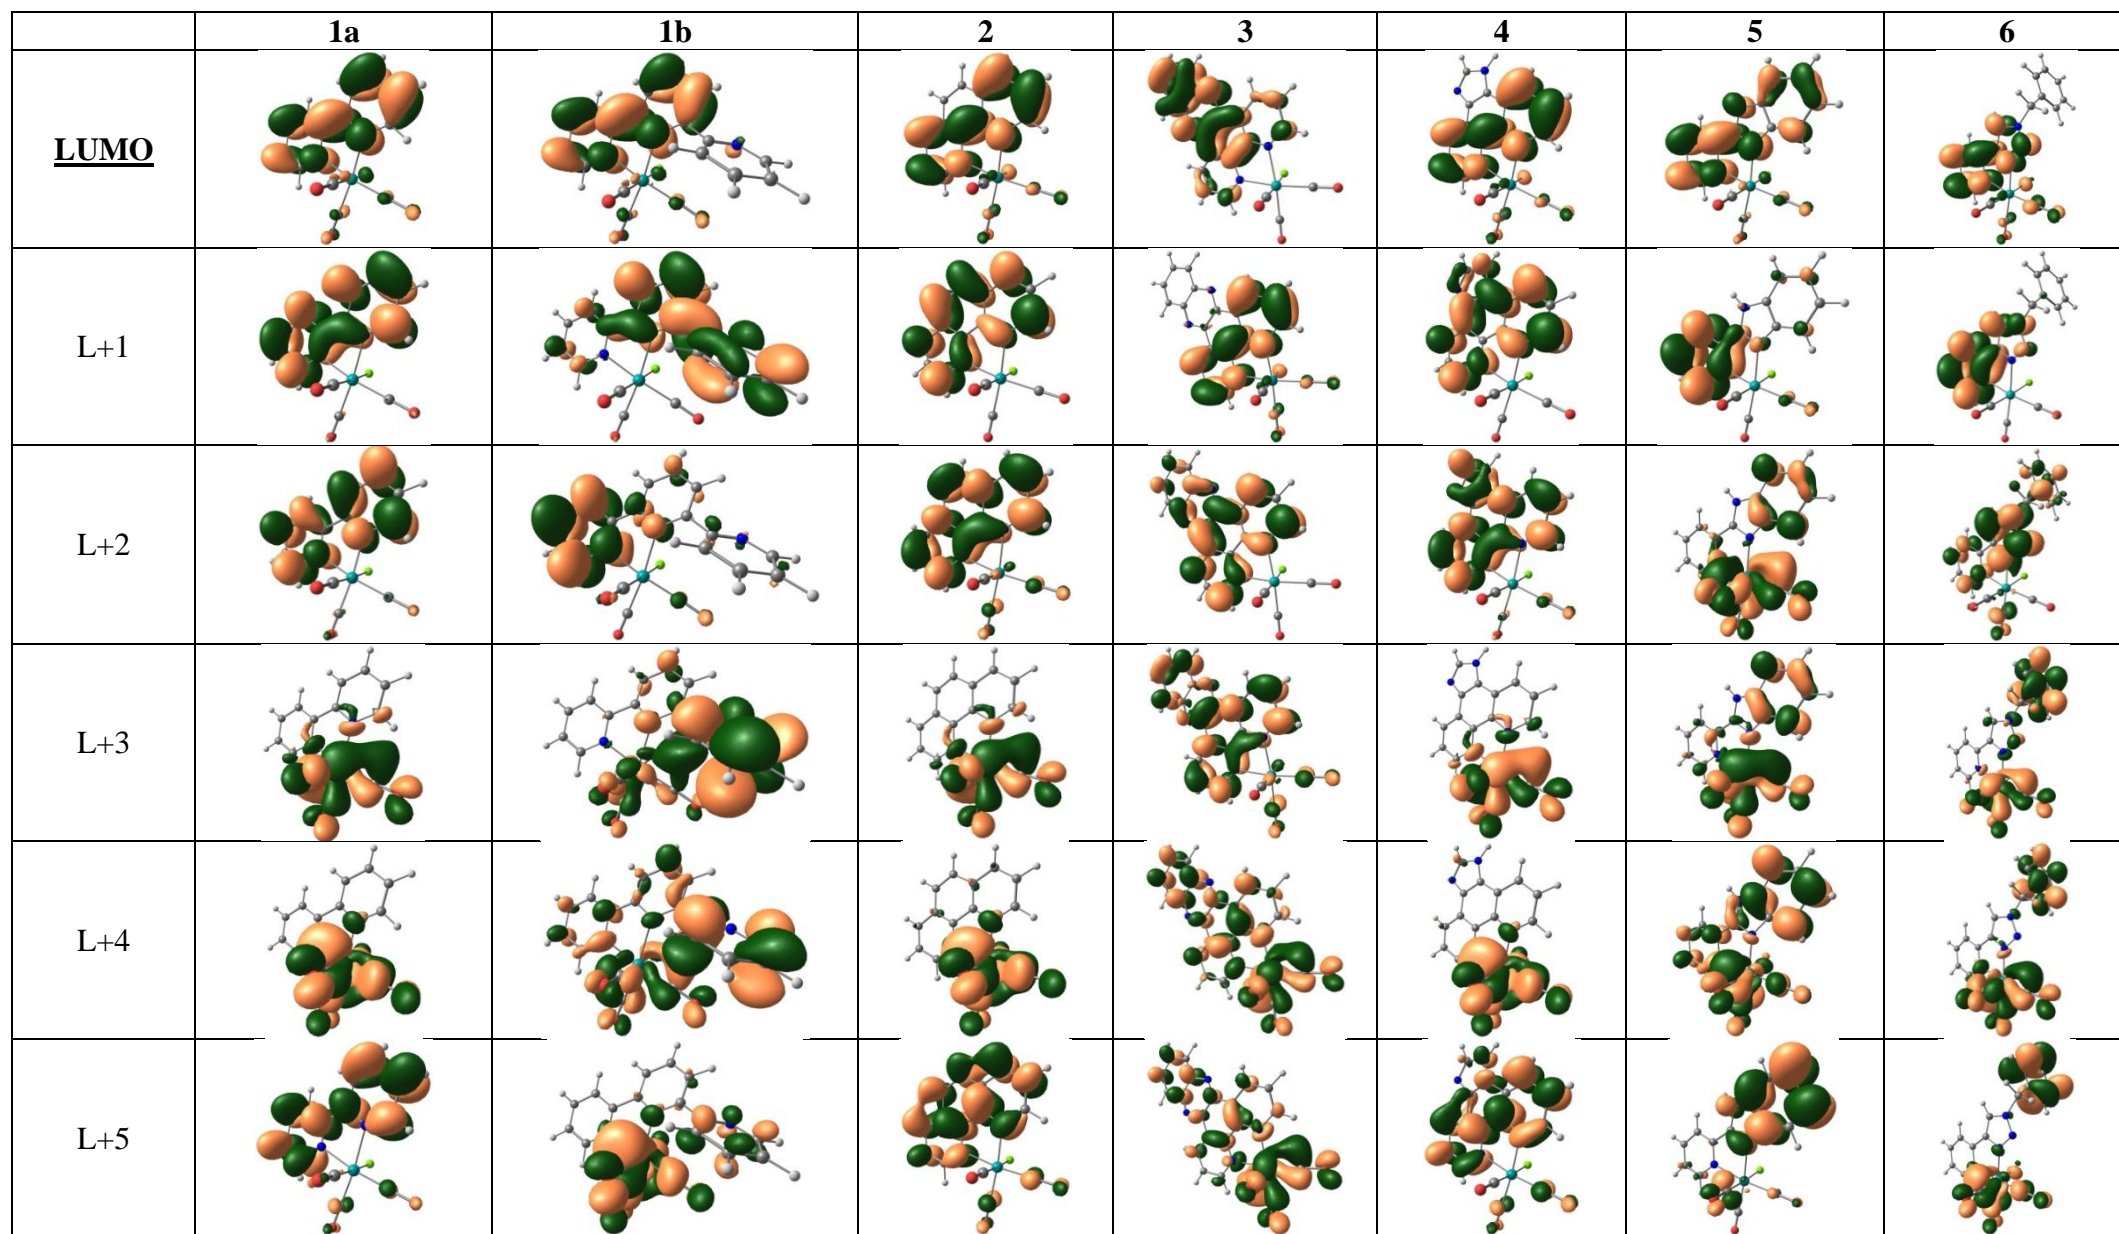

**Figure S1.** Electron density plots of the frontier molecular orbitals for complexes **1–6**. Calculated with the Gaussian-16 software (PBE1PBE/def2-TZVPD/def2-TZVP/PCM/acetonitrile).

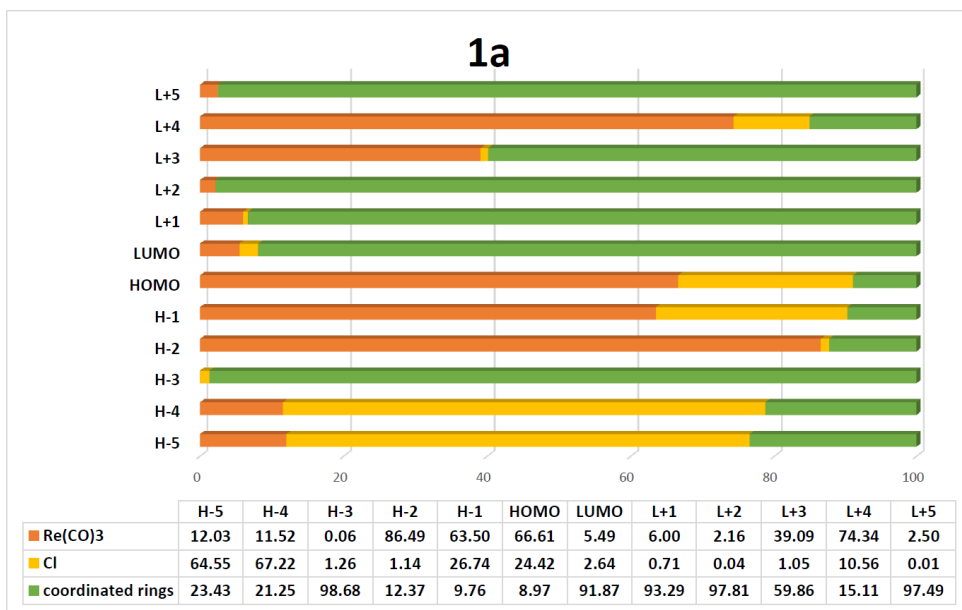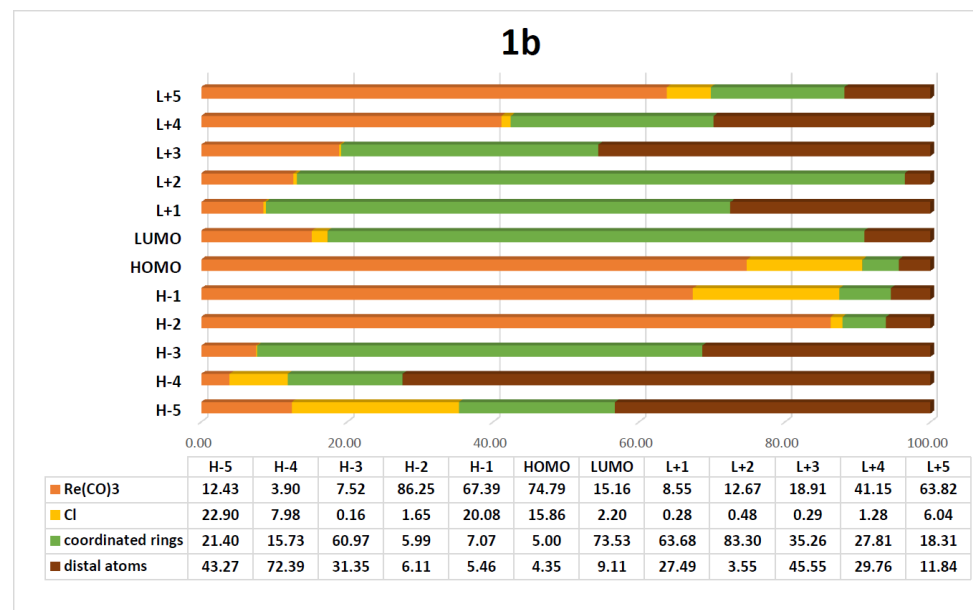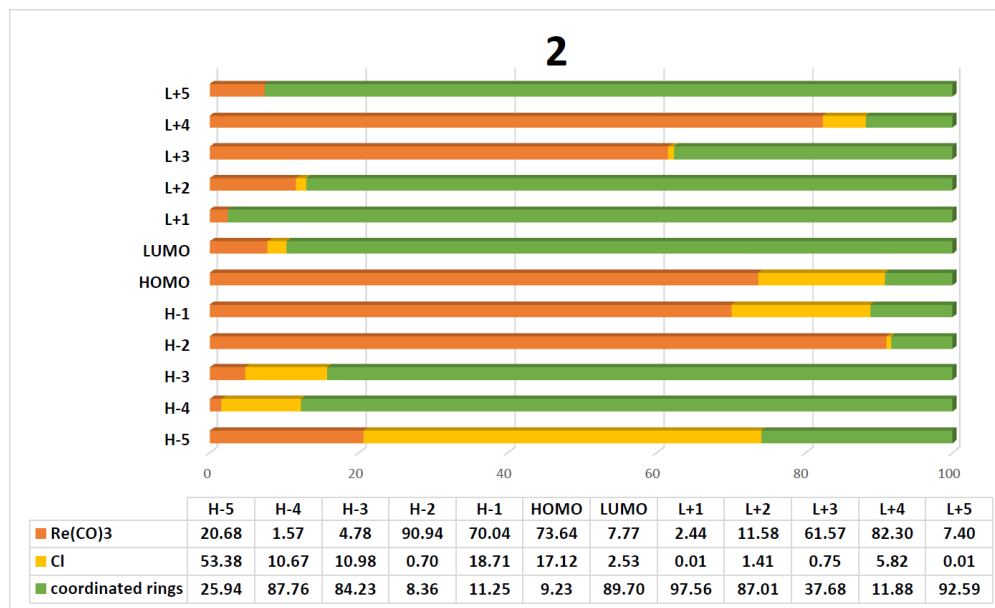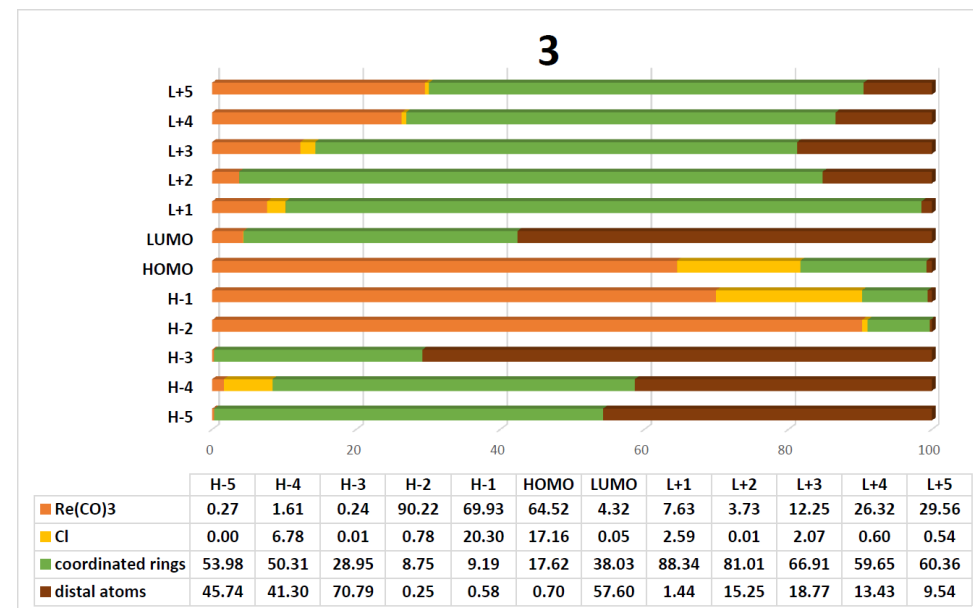



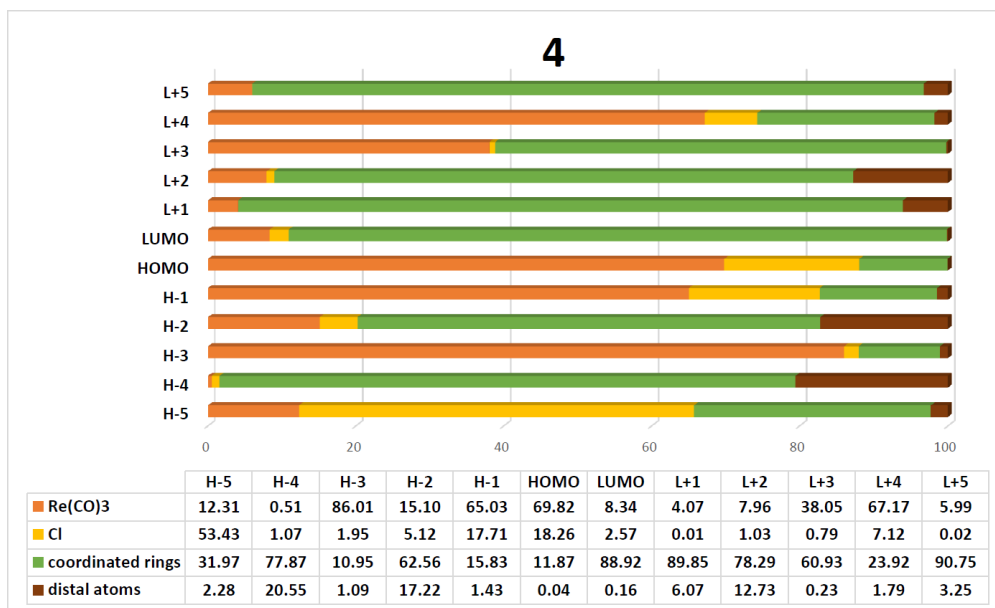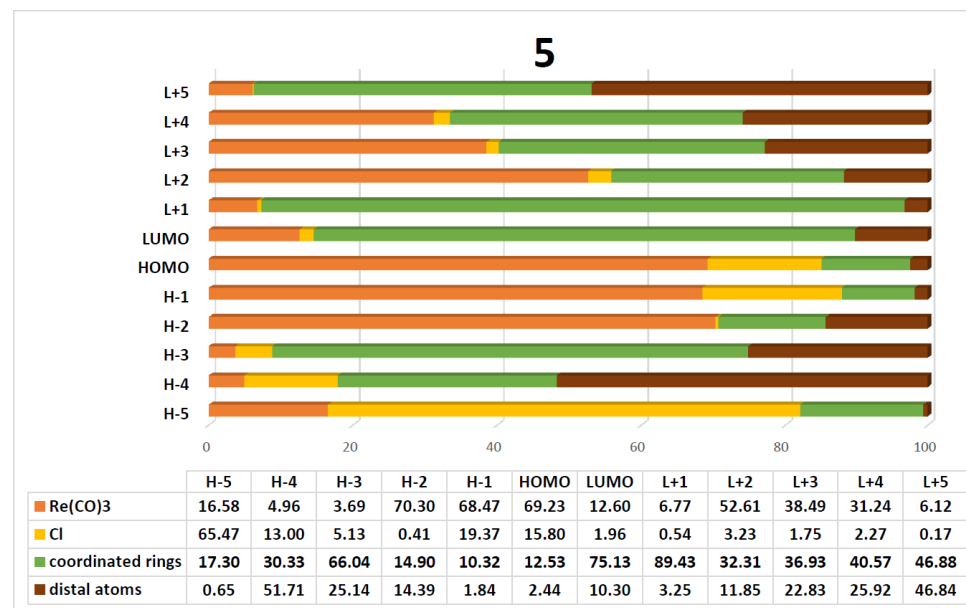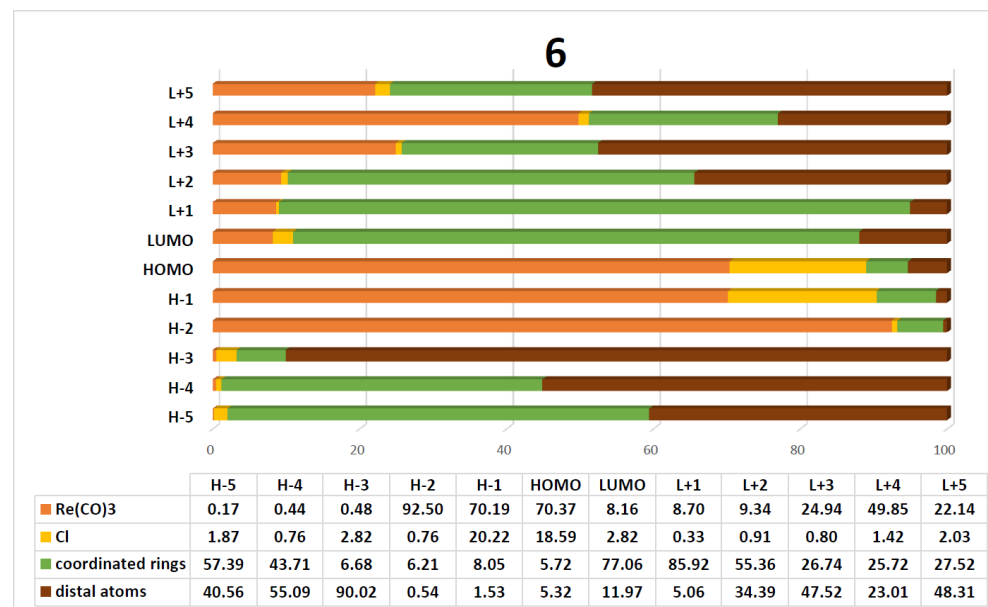

**Figure S2.** Percentage contribution of selected molecular fragments to the frontier molecular orbitals for complexes **1–6**. Calculated with the Gaussian-16 software (PBE1PBE/def2-TZVPD/def2-TZVP/PCM/acetonitrile).

**Table S1.** The relevant electrochemical data of 1–6.

| <b>[ReCl(CO)<sub>3</sub>(bipy)] (1a)</b>                 |                                                                  |                                                      |             |
|----------------------------------------------------------|------------------------------------------------------------------|------------------------------------------------------|-------------|
| <b>medium<sup>a</sup></b>                                | <b>E<sub>red</sub>, peak [V] (ΔE [mV]) or E<sub>1/2red</sub></b> | <b>E<sub>ox</sub>, peak [V] or E<sub>1/2ox</sub></b> | <b>Ref.</b> |
| MeCN 0.1 M TBAP                                          | E <sub>1/2</sub> = -1.41                                         | +1.35                                                | 10          |
| MeCN 0.1 M TBATFB                                        | E <sub>1/2</sub> = -1.32                                         | E <sub>1/2</sub> = +1.36                             | 11          |
| MeCN 0.1 M TBAPF <sub>6</sub>                            | E <sub>1/2</sub> = -1.35                                         | E <sub>1/2</sub> = +1.38                             | 12          |
| MeCN 0.1 M TBAP                                          | E <sub>1/2</sub> = -1.34                                         | +1.33irr                                             | 13          |
| MeCN 0.2 M TBATFB                                        | -1.35irr                                                         | +1.32irr                                             | 14          |
| THF 0.1 M TBAPF <sub>6</sub>                             | -1.91 (110), -2.38                                               | -                                                    | 15          |
| DMF 0.1 M TBAPF <sub>6</sub>                             | -1.83 / E <sub>1/2</sub> = -1.21                                 | +1.55                                                | 16          |
| DMF 0.1 M TBAP                                           | E <sub>1/2</sub> = -1.74 (70), -2.20                             | -                                                    | 17          |
| MeCN 0.05 M TEATFB -54 °C                                | E <sub>1/2</sub> = -1.30, -1.95                                  | E <sub>1/2</sub> = +1.39                             | 18          |
| DMF 0.05 M TEATFB -54 °C                                 | E <sub>1/2</sub> = -1.38                                         | E <sub>1/2</sub> = +1.40                             | 19          |
| DMA 0.1 M TBAPF <sub>6</sub>                             | -1.77, -2.42irr                                                  | -                                                    | 20          |
| DMF 0.1 M TBAPF <sub>6</sub>                             | E <sub>1/2</sub> = -1.13                                         | -                                                    | 21          |
| MeCN 0.1 M TBAPF <sub>6</sub>                            | -                                                                | +1.41 / E <sub>1/2</sub> = +1.82                     | 22          |
| MeCN 0.1M TEATBF                                         | E <sub>1/2</sub> = -1.67                                         | -                                                    | 23          |
| MeCN 0.1 M TBAPF <sub>6</sub>                            | E <sub>1/2</sub> = -1.34, -1.725irr                              | -                                                    | 24          |
| DMF 0.1 M TBAPF <sub>6</sub>                             | -1.78, -2.20                                                     | -                                                    | 25          |
| MeCN 0.1 M TBAPF <sub>6</sub>                            | -1.40, -1.78                                                     | -                                                    | 26          |
| MeCN 0.1 M TBAPF <sub>6</sub>                            | E <sub>1/2</sub> = -1.73, -2.09irr                               | -                                                    | 27          |
| DMF 0.1 M TBAP                                           | -1.26 (80) / E <sub>1/2</sub> = -1.30                            | -                                                    | 28          |
| MeCN 0.1 M TBAP                                          | -1.77 (70), -2.04                                                | -                                                    | 29          |
| MeCN 0.1 M TBAPF <sub>6</sub>                            | E <sub>1/2</sub> = -1.27, -1.57irr                               | +1.47irr, +1.89                                      | 30          |
| DMF 0.1 M TBAPF <sub>6</sub>                             | -1.80, -2.25irr                                                  | -                                                    | 31          |
| DCM 0.1 M TBAPF <sub>6</sub>                             | -1.79, -2.10                                                     | +0.87, +1.15                                         | 32          |
| MeCN 0.1 M TBAPF <sub>6</sub>                            | -1.79, -2.15                                                     | -                                                    | 33          |
| DMF 0.1 M TBAPF <sub>6</sub>                             | E <sub>1/2</sub> = -1.75 (75), -2.22irr                          | -                                                    | 34          |
| MeCN 0.1 M TBAPF <sub>6</sub>                            | E <sub>1/2</sub> = -1.77 (75), -2.18irr                          | -                                                    | 35          |
| DMF 0.1 M TBAPF <sub>6</sub>                             | -1.79, -2.24                                                     | +1.01                                                | 36          |
| DMF 0.1 m TBAPF <sub>6</sub>                             | -1.69                                                            | -                                                    | 37          |
| DMF 0.1 M TBAPF <sub>6</sub>                             | E <sub>1/2</sub> = -1.84, -2.34irr                               | -                                                    |             |
| DMF 0.1 M TBAPF <sub>6</sub>                             | E <sub>1/2</sub> = -1.275                                        | -                                                    |             |
| <b>[ReCl(CO)<sub>3</sub>(terpy-κ<sup>2</sup>N)] (1b)</b> |                                                                  |                                                      |             |
| <b>medium<sup>a</sup></b>                                | <b>E<sub>red</sub>, peak [V] (ΔE [mV]) or E<sub>1/2red</sub></b> | <b>E<sub>ox</sub>, peak [V]</b>                      | <b>Ref.</b> |
| DMF TBAP                                                 | -1.40                                                            | -                                                    | 38          |
| MeCN KPF <sub>6</sub>                                    | -                                                                | +1.19                                                | 17          |
| DMF 0.1 M TBAP                                           | E <sub>1/2</sub> = -1.75 (60), -2.24irr                          | -                                                    | 39          |
| MeCN 0.1 M TBAPF <sub>6</sub>                            | -1.741                                                           | +0.786irr                                            | 31          |
| DCM 0.1 M TBAPF <sub>6</sub>                             | -1.71, -2.15                                                     | +0.60, +0.85, +1.03                                  |             |
| <b>[ReCl(CO)<sub>3</sub>(phen)] (2)</b>                  |                                                                  |                                                      |             |
| <b>medium<sup>a</sup></b>                                | <b>E<sub>red</sub>, peak [V] (ΔE [mV]) or E<sub>1/2red</sub></b> | <b>E<sub>ox</sub>, peak [V] or E<sub>1/2ox</sub></b> | <b>Ref.</b> |
| MeCN 0.1 M TBAP                                          | E <sub>1/2</sub> = -1.34                                         | E <sub>1/2</sub> = +1.33                             | 40          |
| MeCN 0.1 M TBAP                                          | E <sub>1/2</sub> = -1.35                                         | +1.33irr                                             | 10          |
| MeCN 0.1 M TBATFB                                        | E <sub>1/2</sub> = -1.27                                         | E <sub>1/2</sub> = +1.36                             | 11          |
| DMF 0.05 M TEATFB -54 °C                                 | E <sub>1/2</sub> = -1.42, -2.05                                  | E <sub>1/2</sub> = +1.41                             | 18          |
| MeCN 0.1 M TBAPF <sub>6</sub>                            | -                                                                | +1.41 / E <sub>1/2</sub> = +1.84                     | 21          |
| DCM [C6mim][FAP]                                         | E <sub>1/2</sub> = -1.62                                         | E <sub>1/2</sub> = +0.96, +1.56                      | 41          |
| MeCN 0.1 M TBAPF <sub>6</sub>                            | E <sub>1/2</sub> = -1.74, -2.11irr                               | +0.99                                                | 42          |
| DMF 0.1 M TBAPF <sub>6</sub>                             | E <sub>1/2</sub> = -1.75, -2.23irr                               | -                                                    | 31          |
| DCM 0.1M TBAPF <sub>6</sub>                              | -1.74, -2.05                                                     | +0.93                                                | 43          |
| MeCN 0.1 M TBAPF <sub>6</sub>                            | E <sub>1/2</sub> = -1.30 (108)                                   | +1.45irr                                             | 44          |
| MeCN 0.1 M TBAPF <sub>6</sub>                            | E <sub>1/2</sub> = -1.10, -1.33, -1.82                           | E <sub>1/2</sub> = +1.59, +2.06                      |             |
| DMF 1 M TBAPF <sub>6</sub>                               | E <sub>1/2</sub> = -1.06                                         | -                                                    |             |
| <b>[ReCl(CO)<sub>3</sub>(dppz)] (3)</b>                  |                                                                  |                                                      |             |
| <b>medium<sup>a</sup></b>                                | <b>E<sub>red</sub>, peak [V] (ΔE [mV]) or E<sub>1/2red</sub></b> | <b>E<sub>ox</sub>, peak [V]</b>                      | <b>Ref.</b> |
| DCM 0.1 M TBAP or TBAPF <sub>6</sub>                     | E <sub>1/2</sub> = -1.01 (60)                                    | -                                                    | 45,46       |
| THF 0.1 M TBAPF <sub>6</sub>                             | -1.42, -2.00, -2.66irr                                           | +0.92irr                                             | 47          |
| <b>[ReCl(CO)<sub>3</sub>(imphen)] (4)</b>                |                                                                  |                                                      |             |
| <b>[ReCl(CO)<sub>3</sub>(pybimd)] (5)</b>                |                                                                  |                                                      |             |
| <b>medium<sup>a</sup></b>                                | <b>E<sub>red</sub>, peak [V]</b>                                 | <b>E<sub>ox</sub>, peak [V]</b>                      | <b>Ref.</b> |
| MeCN 0.1 M TBAPF <sub>6</sub>                            | -1.74irr, -2.20                                                  | +0.96irr                                             | 48          |
| <b>[ReCl(CO)<sub>3</sub>(pytri-Bn)] (6)</b>              |                                                                  |                                                      |             |
| <b>medium<sup>a</sup></b>                                | <b>E<sub>red</sub>, peak [V]</b>                                 | <b>E<sub>ox</sub>, peak [V]</b>                      | <b>Ref.</b> |
| DCM 0.1 M TBAPF <sub>6</sub>                             | -1.72irr                                                         | +1.50irr                                             | 49          |
| DMF 0.1 M TBAPF <sub>6</sub>                             | -1.69irr                                                         | +1.50irr                                             | 50          |

<sup>a</sup> electrolytes used: TBAPF<sub>6</sub> – tetrabutylammonium hexafluorophosphate; TBAP – tetrabutylammonium perchlorate; TEATFB – tetraethylammonium tetrafluoroborate; TBATFB – tetrabutylammonium tetrafluoroborate; KPF<sub>6</sub> – potassium hexafluorophosphate; [C6mim][FAP] – 1-hexyl-3-methylimidazolium tris(pentafluoroethyl)trifluorophosphate

**Table S2.** The absorption and emission properties of complexes **1–6**.

| <b>[ReCl(CO)<sub>3</sub>(bipy)] (1a)</b>                         |                             |                             |                            |              |                        |      |
|------------------------------------------------------------------|-----------------------------|-----------------------------|----------------------------|--------------|------------------------|------|
| medium                                                           | $\lambda_{\text{abs}}$ (nm) | $\lambda_{\text{exc}}$ (nm) | $\lambda_{\text{PL}}$ (nm) | $\tau$       | $\phi_{\text{PL}}$ (%) | Ref. |
| MeCN                                                             | 370                         | –                           | 612                        | 25 ns        | –                      | 11   |
| DCM                                                              | 384                         | –                           | 612                        | 50 ns        | –                      |      |
| DMF                                                              | 373                         | –                           | 610                        | 26 ns        | –                      |      |
| EtOH                                                             | 372                         | –                           | 604                        | 36 ns        | –                      |      |
| THF                                                              | 388                         | –                           | 614                        | 65 ns        | –                      |      |
| dioxane                                                          | 390                         | –                           | 614                        | 62 ns        | –                      |      |
| benzene                                                          | 400                         | –                           | 612                        | 70 ns        | –                      |      |
| EtOH                                                             | –                           | –                           | 612                        | –            | –                      |      |
| EtOH 175 K                                                       | –                           | –                           | 529                        | –            | –                      |      |
| DCM                                                              | 242, 256, 294, 320sh, 386   | –                           | 622                        | 50 ns        | –                      |      |
| EtOH:MeOH (4:1) 77 K                                             | –                           | –                           | 550                        | 2.78 $\mu$ s | –                      |      |
| DMF<br>0.10 M TBAPF <sub>6</sub>                                 | 294, 318sh, 372             | –                           | –                          | –            | –                      |      |
| 2-MeTHF 80 K                                                     | 375                         | –                           | 532                        | 2.7 $\mu$ s  | 2.8                    |      |
| THF                                                              | 389                         | –                           | 612                        | 45 ns        | –                      |      |
| DCM                                                              | 239, 294, 387               | –                           | –                          | –            | –                      |      |
| DMA                                                              | –                           | –                           | 607                        | –            | –                      |      |
| H <sub>2</sub> O:dioxane (1:4)                                   | 368                         | –                           | 605                        | 29 ns        | 0.4                    |      |
| H <sub>2</sub> O:dioxane (1:4) 77 K                              | –                           | –                           | 536                        | 2.9 $\mu$ s  | –                      |      |
| DCM                                                              | –                           | –                           | 642                        | 39 ns        | 0.31                   |      |
| DMF                                                              | 370                         | –                           | 580                        | –            | –                      |      |
| DMF                                                              | –                           | –                           | 637                        | 25 ns        | 0.3                    |      |
| MeCN                                                             | 371                         | –                           | 633                        | –            | 0.27                   |      |
| 77K 2-MeTHF                                                      | –                           | –                           | –                          | 3.17 $\mu$ s | –                      |      |
| DMSO                                                             | –                           | 319                         | 576                        | 21 ns        | 26.1                   |      |
| MeCN                                                             | 291, 371                    | –                           | –                          | –            | –                      |      |
| DMF                                                              | ~373, 400, 443, 466, 500    | –                           | –                          | –            | –                      |      |
| DMF:MeOH                                                         | 294, 317, 371               | –                           | 598                        | –            | 0.23                   |      |
| DCM                                                              | 385                         | 385                         | 600                        | 51 ns        | 0.5                    |      |
| DMF                                                              | 369                         | –                           | 611                        | –            | –                      |      |
| toluene                                                          | 401                         | –                           | 604                        | –            | 0.58                   |      |
| EtOH:MeOH (4:1) 77 K                                             | –                           | –                           | –                          | 4.1 $\mu$ s  | –                      |      |
| EtOH:MeOH (4:1)                                                  | –                           | –                           | –                          | 23.6 ns      | –                      |      |
| THF                                                              | 372                         | –                           | 613                        | 25 ns        | –                      |      |
| DCM                                                              | 293, 385                    | –                           | 612                        | –            | –                      |      |
| THF                                                              | –                           | –                           | 621                        | 23.35 ns     | 0.5                    |      |
| toluene                                                          | 399                         | –                           | 641                        | 24.2 ns      | –                      |      |
| DCM                                                              | –                           | –                           | –                          | –            | 0.58                   |      |
| MeCN                                                             | 234, 290, 315, 370          | –                           | 611                        | 29 ns        | 0.2                    |      |
| PMMA (film)                                                      | –                           | –                           | 562                        | 332 ns       | –                      |      |
| DMF                                                              | 293, 373                    | –                           | 606                        | –            | –                      |      |
| CHCl <sub>3</sub>                                                | –                           | 393, 316sh, 295             | 622                        | 51.0 ns      | 1.65                   |      |
| MeCN                                                             | 290, 332, 381               | 369, 299                    | 639                        | 26.4 ns      | 0.71                   |      |
| solid                                                            | –                           | 471                         | 584                        | 0.6 $\mu$ s  | –                      |      |
| DMF                                                              | 370                         | 370                         | 574                        | 46.6 ns      | –                      |      |
| DMF                                                              | 317, 371                    | –                           | 596                        | 25 ns        | 0.56                   |      |
| toluene:DCM (1:1)                                                | –                           | 404                         | 625                        | –            | –                      |      |
| DCM                                                              | 290, 390                    | –                           | 620                        | 45 ns        | –                      |      |
| EtOH                                                             | 290, 365, 315               | –                           | 620                        | 24 ns        | –                      |      |
| EtOH 77 K                                                        | –                           | –                           | 530                        | 2.8 $\mu$ s  | –                      |      |
| DMSO                                                             | 368                         | 455                         | 631                        | 22.69 ns     | –                      |      |
| <b>[ReCl(CO)<sub>3</sub>(terpy-<math>\kappa^2</math>N)] (1b)</b> |                             |                             |                            |              |                        |      |
| medium                                                           | $\lambda_{\text{abs}}$ (nm) | $\lambda_{\text{exc}}$ (nm) | $\lambda_{\text{PL}}$ (nm) | $\tau$       | $\phi_{\text{PL}}$ (%) | Ref. |
| DMF:DCM (9:1) 77 K                                               | –                           | –                           | 530                        | 3.4 $\mu$ s  | –                      | 38   |
| MeCN                                                             | 250–300, 320–400            | 360                         | 506                        | –            | –                      | 39   |
| DCM                                                              | 220, 295, 378               | 442                         | 509                        | 2.02 $\mu$ s | 0.3                    | 68   |
| solid                                                            | –                           | 365                         | 562                        | 1.95 $\mu$ s | –                      | –    |
| DMSO                                                             | ~310, 380                   | –                           | –                          | –            | –                      | 69   |
| CHCl <sub>3</sub>                                                | –                           | 393, 322sh, 301, 265        | 638                        | 4.59 ns      | 0.42                   | 31   |
| MeCN                                                             | 306, 323, 375               | 380, 323, 303               | 656                        | 3.59 ns      | <0.01                  |      |
| solid                                                            | –                           | 491                         | 582                        | 0.6 $\mu$ s  | –                      |      |
| DMSO:H <sub>2</sub> O (1:9)                                      | 360                         | –                           | –                          | –            | –                      | 70   |
| <b>[ReCl(CO)<sub>3</sub>(phen)] (2)</b>                          |                             |                             |                            |              |                        |      |
| medium                                                           | $\lambda_{\text{abs}}$ (nm) | $\lambda_{\text{exc}}$ (nm) | $\lambda_{\text{PL}}$ (nm) | $\tau$       | $\phi_{\text{PL}}$ (%) | Ref. |
| MeCN                                                             | 364                         | 353                         | 612                        | 178 ns       | –                      | 11   |
| DCM                                                              | 374                         |                             | 604                        | 288 ns       | –                      |      |
| DMF                                                              | 366                         |                             | 614                        | 155 ns       | –                      |      |
| EtOH                                                             | 369                         |                             | 600                        | 216 ns       | –                      |      |



|                                             |                                               |                                               |                                              |                          |                                          |             |
|---------------------------------------------|-----------------------------------------------|-----------------------------------------------|----------------------------------------------|--------------------------|------------------------------------------|-------------|
| THF                                         | 382                                           |                                               | 622                                          | 335 ns                   | –                                        |             |
| Dioxane                                     | 384                                           |                                               | 620                                          | 340 ns                   | –                                        |             |
| Beznene                                     | 388                                           |                                               | 610                                          | 320 ns                   | –                                        |             |
| MeCN                                        | 373                                           | –                                             | –                                            | –                        | –                                        | 71          |
| EtOH:MeOH (4:1) 77 K                        | –                                             | –                                             | –                                            | 7.2 $\mu$ s              | –                                        |             |
| MeOH                                        | 212, 265, 288, 365                            | –                                             | –                                            | –                        | –                                        | 72          |
| DCM                                         | ~275, 380                                     | –                                             | –                                            | –                        | –                                        | 73          |
| 2-MeTHF                                     | 386                                           | 400                                           | 606                                          | 227 ns                   | 1.3                                      | 74          |
| 2-MeTHF 77 K                                | –                                             | –                                             | 535                                          | 7.6 $\mu$ s              | –                                        |             |
| MeCN                                        | ~215, 260, 360                                | 337                                           | 573                                          | 1835 ns                  | 1.77                                     | 75          |
| MeCN                                        | –                                             | –                                             | 600                                          | 183 ns                   | 1.7                                      | 76          |
| DMSO                                        | –                                             | 319                                           | 577                                          | 32 ns                    | 60.3                                     | 56          |
| THF                                         | 386                                           | 410                                           | 594                                          | 197 ns                   | 1.3                                      | 77          |
| 2-MeTHF 77K                                 | –                                             | 410                                           | 524                                          | 7.6 $\mu$ s              | –                                        |             |
| DMF                                         | ~280, 370                                     | –                                             | –                                            | –                        | –                                        | 78          |
| DCM                                         | 380                                           | 380                                           | 577                                          | –                        | –                                        | 60          |
|                                             |                                               | 405                                           | –                                            | 300 ns                   | –                                        |             |
|                                             |                                               | 355                                           | –                                            | –                        | 3.6                                      |             |
| CHCl <sub>3</sub>                           | 200, 265, 365                                 | –                                             | –                                            | –                        | –                                        | 79          |
| MeCN                                        | –                                             | 355                                           | 600                                          | 183 ns                   | 1.7                                      |             |
| DCM                                         | 200, 216, 265, 290, 365                       | –                                             | –                                            | –                        | –                                        | 80          |
| MeCN                                        | ~220, 270, 375                                | –                                             | 600                                          | 0.18 $\mu$ s             | 1.7                                      |             |
| PMMA (film)                                 | –                                             | –                                             | 550                                          | 1.3 $\mu$ s              | –                                        |             |
| MeCN                                        | ~260, 280, 360                                | 370                                           | 605                                          | –                        | –                                        | 81          |
| MeCN                                        | 200, 216, 265, 290, 365                       | 375                                           | 600                                          | 138 ns                   | 1.66                                     | 64          |
| PMMA (film)                                 | –                                             | 375                                           | 550                                          | 1390 ns                  | –                                        |             |
| THF                                         | –                                             | –                                             | ~600                                         | –                        | –                                        | 82          |
| 2-MeTHF 77 K                                | –                                             | 400                                           | ~520                                         | –                        | –                                        |             |
| CHCl <sub>3</sub>                           | –                                             | 382, 292, 265                                 | 617                                          | 306.6 ns                 | 2.39                                     |             |
| MeCN                                        | –                                             | 369, 291, 246                                 | 629                                          | 130.3 ns                 | 2.22                                     |             |
| solid                                       | –                                             | 489                                           | 539                                          | 1.5 $\mu$ s              | –                                        |             |
| MeCN                                        | ~220, 265, 365                                | 375                                           | 602                                          | 147 ns                   | 1.7                                      | 83          |
| MeCN                                        | 266, 368                                      | 380                                           | 592                                          | 204 ns                   | 3.2                                      | 43          |
| EtOH                                        | ~220, 270                                     | –                                             | –                                            | –                        | –                                        | 84          |
| MeCN                                        | 200, 216, 265, 365                            | 375                                           | 590                                          | –                        | –                                        | 44          |
| DMF                                         | –                                             | 375                                           | 602                                          | 135 ns                   | 1.6                                      |             |
| <b>[ReCl(CO)<sub>3</sub>(dppz)] (3)</b>     |                                               |                                               |                                              |                          |                                          |             |
| <b>medium</b>                               | <b><math>\lambda_{\text{abs}}</math> (nm)</b> | <b><math>\lambda_{\text{exc}}</math> (nm)</b> | <b><math>\lambda_{\text{PL}}</math> (nm)</b> | <b><math>\tau</math></b> | <b><math>\Phi_{\text{PL}}</math> (%)</b> | <b>Ref.</b> |
| DCM                                         | 280, 360                                      | –                                             | –                                            | 0.04 $\mu$ s*            | –                                        | 45          |
| DCM                                         | 360, 378                                      | –                                             | –                                            | –                        | –                                        | 47          |
| DCM                                         | 380                                           | 342                                           | 588                                          | –                        | <0.01                                    | 85          |
| DCM                                         | 380                                           | –                                             | –                                            | –                        | –                                        | 86          |
| DCM                                         | 280, 322, 376, 394                            | –                                             | –                                            | 40 ns**                  | –                                        | 87          |
| C <sub>3</sub> H <sub>7</sub> CN            | –                                             | –                                             | –                                            | 3.5 ns**                 | –                                        |             |
| MeCN                                        | –                                             | –                                             | –                                            | 2.5 ns**                 | –                                        |             |
| DCM                                         | 280, 360                                      | –                                             | –                                            | –                        | –                                        | 46          |
| <b>[ReCl(CO)<sub>3</sub>(imphen)] (4)</b>   |                                               |                                               |                                              |                          |                                          |             |
| <b>medium</b>                               | <b><math>\lambda_{\text{abs}}</math> (nm)</b> | <b><math>\lambda_{\text{exc}}</math> (nm)</b> | <b><math>\lambda_{\text{PL}}</math> (nm)</b> | <b><math>\tau</math></b> | <b><math>\Phi_{\text{PL}}</math> (%)</b> | <b>Ref.</b> |
| DMSO                                        | 260, 286, 301, 322, 340, 396                  | 405                                           | 625                                          | 223.27 ns                | 3.11                                     | 88          |
| EtOH:MeOH (4:1) 77 K                        | –                                             | 400                                           | 546                                          | 7.76 $\mu$ s             | –                                        |             |
| <b>[ReCl(CO)<sub>3</sub>(pybimd)] (5)</b>   |                                               |                                               |                                              |                          |                                          |             |
| <b>medium</b>                               | <b><math>\lambda_{\text{abs}}</math> (nm)</b> | <b><math>\lambda_{\text{exc}}</math> (nm)</b> | <b><math>\lambda_{\text{PL}}</math> (nm)</b> | <b><math>\tau</math></b> | <b><math>\Phi_{\text{PL}}</math> (%)</b> | <b>Ref.</b> |
| DCM                                         | ~325                                          | 380                                           | 590                                          | 0.075 $\mu$ s            | 3.1                                      | 89          |
| THF                                         | ~240, 320, 336                                |                                               | ~605                                         | –                        | –                                        |             |
| CHCl <sub>3</sub>                           | ~240, 325                                     |                                               | ~590                                         | –                        | –                                        |             |
| DMSO                                        | ~260, 320, 340                                |                                               | ~585                                         | –                        | –                                        |             |
| MeCN                                        | ~320, 330                                     |                                               | ~600                                         | –                        | –                                        |             |
| MeOH                                        | 336                                           |                                               | 576                                          | 0.087 $\mu$ s            | 4.6                                      |             |
| solid                                       | –                                             |                                               | ~555                                         | –                        | –                                        |             |
| MeCN                                        | ~320, 340, 390                                |                                               | 375                                          | ~600                     | 3.3 $\mu$ s                              |             |
| <b>[ReCl(CO)<sub>3</sub>(pytri-Bn)] (6)</b> |                                               |                                               |                                              |                          |                                          |             |
| <b>medium</b>                               | <b><math>\lambda_{\text{abs}}</math> (nm)</b> | <b><math>\lambda_{\text{exc}}</math> (nm)</b> | <b><math>\lambda_{\text{PL}}</math> (nm)</b> | <b><math>\tau</math></b> | <b><math>\Phi_{\text{PL}}</math> (%)</b> | <b>Ref.</b> |
| MeCN                                        | 333                                           | 333                                           | 538                                          | –                        | 0.33                                     | 55          |
| 2-MeTHF 77 K                                | –                                             | 355                                           | –                                            | 8.90 $\mu$ s             | –                                        |             |
| MeCN                                        | 270, 290, 336                                 | 364                                           | 532                                          | 103 ns                   | 1.2                                      | 49          |
| DCM                                         | 346                                           | 351                                           | 547                                          | 0.80 $\mu$ s             | 4.9                                      | 50          |
| MeCN                                        | 330                                           |                                               | 532                                          | 0.10 $\mu$ s             | 1.2                                      |             |
| DCM                                         | 348                                           |                                               | 383                                          | 538                      | –                                        | –           |

\* obtained from ns-TA measurements; \*\* obtained from TRIR measurements

**Table S3.** The spectroscopic and electrochemical properties of complexes 7–46.

| complex | medium               | $\lambda_{\text{abs}}$ (nm) | $\lambda_{\text{exc}}$ (nm) | $\lambda_{\text{PL}}$ (nm) | $\tau$          | $\Phi_{\text{PL}}$ (%) | TA $\tau$                  | TE $\tau$                  | TRIR $\tau$          | $E_{\text{red, peak}}$ [V] | $E_{\text{ox, peak}}$ [V] | Ref. |                           |
|---------|----------------------|-----------------------------|-----------------------------|----------------------------|-----------------|------------------------|----------------------------|----------------------------|----------------------|----------------------------|---------------------------|------|---------------------------|
| 7       | DCM                  | 299, 348, 398               | 350                         | 437, 640                   | 4.4 ns, 13.8 ns | <1                     | –                          | –                          | –                    | –1.36                      | +1.14, +1.65              | 90   |                           |
|         | toluene              | –                           |                             | ~400, 640                  | –               | –                      | –                          | –                          | –                    | –                          | –                         |      |                           |
|         | CHCl <sub>3</sub>    | –                           |                             | ~440, 640                  | –               | –                      | –                          | –                          | –                    | –                          | –                         |      |                           |
|         | MeCN                 | –                           |                             | ~480                       | –               | –                      | –                          | –                          | –                    | –                          | –                         |      |                           |
| 8       | DCM                  | 362, 368, 448, 466          | 325                         | 425, 500, ~650             | –               | –                      | 190 ns                     | 200 ns                     | 20 ps, 124 ns        | –                          | –                         | 91   |                           |
|         | MeCN                 | 350, 359, 437, 446          |                             | 478, ~650sh                | –               | –                      | 140 ns                     | < 6 ns                     | 57 ps, ~2 ns, 100 ns | –                          | –                         |      |                           |
| 9       | DCM                  | 345, 356, 405, 431          | 325                         | 420, 445, ~650             | –               | –                      | 100 ns                     | 100 ns                     | 20 ps, 88 ns         | –                          | –                         | 92   |                           |
|         | MeCN                 | 349, 360, 429, 449          |                             | 460, ~650                  | –               | –                      | 80 ns                      | < 6 ns                     | 34 ps, 400 ps, 66 ns | –                          | –                         |      |                           |
| 10      | DCM                  | 303, 376, 460               | 350                         | 520                        | <10 ns          | –                      | 600 ns                     | –                          | –                    | –                          | –                         | 92   |                           |
|         | MeCN                 | –                           |                             | 514                        | <10 ns          | –                      | –                          | –                          | –                    | –                          | –                         |      |                           |
| 11      | DCM                  | 389,479                     |                             | 510                        | <10 ns          | –                      | 1.7 $\mu$ s                | –                          | –                    | –                          | –                         |      | –                         |
|         | MeCN                 | –                           |                             | 510                        | <10 ns          | –                      | 1 $\mu$ s                  | –                          | –                    | –                          | –                         |      | –                         |
| 12      | DCM                  | 343, 500                    | 355                         | 680                        | –               | 6.0                    | 3.9 $\mu$ s                | –                          | –                    | –1.16, –1.53irr            | +0.92, +1.42irr, +1.74irr | 93   |                           |
|         | 2-MeTHF 77 K         | –                           |                             | 589                        | –               | –                      | –                          | –                          | –                    | –                          | –                         |      |                           |
| 13      | DCM                  | 292, 336, 496               |                             | 701                        | –               | 1.0                    | –                          | –                          | –                    | –                          | –1.14, –1.52irr           |      | +0.98, +1.29irr, +1.72irr |
|         | 2-MeTHF 77 K         | –                           |                             | 590                        | –               | –                      | –                          | –                          | –                    | –                          | –                         |      | –                         |
| 14      | DCM                  | 368, 498                    |                             | 686                        | –               | 4.0                    | –                          | –                          | –                    | –                          | –1.13, –1.48irr           |      | +0.96, +1.48irr, +1.72irr |
|         | 2-MeTHF 77 K         | –                           |                             | 582                        | –               | –                      | –                          | –                          | –                    | –                          | –                         |      | –                         |
| 15      | DCM                  | 348, 513                    |                             | 703                        | –               | 6.0                    | –                          | –                          | –                    | –                          | –1.20, –1.59irr           |      | +0.90, +1.48irr, +1.61irr |
|         | 2-MeTHF 77 K         | –                           |                             | 594                        | –               | –                      | –                          | –                          | –                    | –                          | –                         |      | –                         |
| 16      | DCM                  | 344, 524                    |                             | 708                        | –               | 7.0                    | 4.4 $\mu$ s                | –                          | –                    | –                          | –1.19, –1.62irr           |      | +0.86, +1.41irr, +1.62irr |
|         | 2-MeTHF 77 K         | –                           |                             | 619                        | –               | –                      | –                          | –                          | –                    | –                          | –                         |      | –                         |
| 17      | DCM                  | 378, 450                    | –                           | 672                        | 18 ns           | 5.0                    | –                          | –                          | –                    | –                          | –                         | 94   |                           |
| 18      | MeCN                 | 420                         | 456                         | 695                        | 14.6 ns         | 0.4                    | –                          | –                          | –                    | –1.72                      | +0.66                     | 95   |                           |
|         | CHCl <sub>3</sub>    | 438                         | 447                         | 628                        | 122.6 ns        | 0.8                    | –                          | –                          | –                    | –                          | –                         |      |                           |
|         | solid (film)         | 463                         | 320                         | 369, 529                   | –               | –                      | –                          | –                          | –                    | –                          | –                         |      |                           |
|         | EtOH:MeOH (4:1) 77 K | –                           | 453                         | 569, 601sh                 | 241.4 $\mu$ s   | –                      | –                          | –                          | –                    | –                          | –                         |      |                           |
| 19      | DCM                  | 389                         | 355                         | 604                        | 2.98 $\mu$ s    | 1.3                    | –                          | –                          | –                    | –                          | –                         | 96   |                           |
| 20      | DCM                  | 386                         |                             | 605                        | 6 $\mu$ s       | 1.6                    | –                          | –                          | –                    | –                          | –                         |      | –                         |
|         |                      |                             |                             | 607                        | 3.9 $\mu$ s     | 0.5                    | –                          | –                          | 37 ps                | –                          | –                         |      | –                         |
| 21      | DCM                  | 410                         |                             | 678                        | 44 ns           | 0.2                    | –                          | –                          | 44 ns                | –                          | –                         |      | –                         |
| 22      | DCM                  | 401                         | 689                         | 27 ns                      | 0.1             | –                      | –                          | 27 ns                      | –                    | –                          | –                         |      |                           |
| 23      | DCM                  | –                           | 355                         | –                          | –               | –                      | 28 ns                      | –                          | –                    | –1.28                      | +0.84, +1.52              | 97   |                           |
| 24      | DCM                  | ~347, 480                   |                             | ~610                       | 290 ns          | 0.55                   | 280 ns                     | –                          | –                    | –1.25                      | +1.51                     |      |                           |
| 25      | DCM                  | –                           |                             | –                          | –               | –                      | –                          | 12.0 $\mu$ s, 42.5 $\mu$ s | –                    | –                          | –                         |      | –                         |
| 26      | DCM                  | –                           | –                           | –                          | –               | –                      | 12.4 $\mu$ s, 43.6 $\mu$ s | –                          | –                    | –                          | –                         | 98   |                           |
| 27      | DCM                  | –                           | –                           | –                          | –               | –                      | 0.06 $\mu$ s               | –                          | –                    | –                          | –                         |      |                           |
| 28      | toluene              | 392                         | –                           | ~600                       | –               | –                      | 0.06 $\mu$ s               | –                          | –                    | –                          | –                         | 99   |                           |
|         | dioxane              | 488                         | –                           | 588                        | –               | –                      | 1.4 $\mu$ s                | –                          | 1.2 $\mu$ s          | –                          | –                         |      |                           |
|         | CHCl <sub>3</sub>    | 478                         | –                           | 626                        | –               | –                      | –                          | –                          | –                    | –                          | –                         |      |                           |
|         | ethyl acetate        | 496                         | –                           | 702                        | –               | –                      | –                          | –                          | –                    | –                          | –                         |      | –                         |
|         |                      | 473                         | –                           | 709                        | –               | –                      | –                          | –                          | –                    | –                          | –                         |      | –                         |
|         | THF                  | 476                         | –                           | 709                        | –               | –                      | –                          | –                          | –                    | –                          | –                         |      |                           |
| DCM     | 488                  | –                           | 740                         | –                          | –               | 3.8 $\mu$ s            | –                          | –                          | –0.97                | +1.05                      |                           |      |                           |
| MeCN    | –                    | –                           | –                           | –                          | –               | –                      | –                          | 1.6 $\mu$ s                | –0.81                | +1.07                      |                           |      |                           |
| 29      | toluene              | 497                         | –                           | 641                        | –               | –                      | 1.8 $\mu$ s                | –                          | –                    | –                          | –                         | 99   |                           |
|         | dioxane              | 485                         | –                           | 674                        | –               | –                      | –                          | –                          | –                    | –                          | –                         |      |                           |
|         | CHCl <sub>3</sub>    | 510                         | –                           | 727                        | –               | –                      | –                          | –                          | –                    | –                          | –                         |      |                           |
|         | ethyl acetate        | 482                         | –                           | 727                        | –               | –                      | –                          | –                          | –                    | –                          | –                         |      |                           |
|         | THF                  | 492                         | –                           | 724                        | –               | –                      | –                          | –                          | –                    | –                          | –                         |      |                           |

| complex       | medium          | $\lambda_{\text{abs}}$ (nm) | $\lambda_{\text{exc}}$ (nm) | $\lambda_{\text{PL}}$ (nm) | $\tau$ | $\Phi_{\text{PL}}$ (%) | TA $\tau$                   | TE $\tau$         | TRIR $\tau$                      | $E_{\text{red}}$ peak [V] | $E_{\text{ox}}$ peak [V] | Ref.  |  |
|---------------|-----------------|-----------------------------|-----------------------------|----------------------------|--------|------------------------|-----------------------------|-------------------|----------------------------------|---------------------------|--------------------------|-------|--|
|               | DCM             | 520                         | –                           | 783                        | –      | –                      | 1.6 $\mu\text{s}$           | –                 | –                                | –0.85                     | +1.05                    |       |  |
| 30            | toluene         | 490                         | –                           | 641                        | –      | –                      | 1.8 $\mu\text{s}$           | –                 | –                                | –                         | –                        |       |  |
|               | dioxane         | 479                         | –                           | 665                        | –      | –                      | –                           | –                 | –                                | –                         | –                        |       |  |
|               | $\text{CHCl}_3$ | 504                         | –                           | 717                        | –      | –                      | –                           | –                 | –                                | –                         | –                        |       |  |
|               | ethyl acetate   | 479                         | –                           | 715                        | –      | –                      | –                           | –                 | –                                | –                         | –                        |       |  |
|               | THF             | 491                         | –                           | 724                        | –      | –                      | –                           | –                 | –                                | –                         | –                        |       |  |
|               | DCM             | 515                         | –                           | 721                        | –      | –                      | 10.1 $\mu\text{s}$          | –                 | 20 ps, 300 ps, 2.8 $\mu\text{s}$ | –0.88                     | +1.05                    |       |  |
|               | toluene         | –                           | –                           | ~410, 580                  | –      | –                      | –                           | –                 | –                                | –                         | –                        | –     |  |
|               | dioxane         | –                           | –                           | ~400, 620                  | –      | –                      | –                           | –                 | –                                | –                         | –                        | –     |  |
|               | chlorobenzene   | –                           | –                           | ~655                       | –      | –                      | –                           | –                 | –                                | –                         | –                        | –     |  |
|               | $\text{CHCl}_3$ | –                           | –                           | ~700                       | –      | –                      | –                           | –                 | –                                | –                         | –                        | –     |  |
|               | ethyl acetate   | –                           | –                           | ~405, 705                  | –      | –                      | –                           | –                 | –                                | –                         | –                        | –     |  |
|               | THF             | –                           | –                           | ~405, 705                  | –      | –                      | –                           | –                 | –                                | –                         | –                        | –     |  |
| 31            | DCM             | 489                         | –                           | 740                        | –      | –                      | –                           | 3.8 $\mu\text{s}$ | –                                | –0.97                     | +1.05                    |       |  |
|               | toluene         | –                           | –                           | ~670                       | –      | –                      | –                           | –                 | –                                | –                         | –                        |       |  |
|               | dioxane         | –                           | –                           | ~670                       | –      | –                      | –                           | –                 | –                                | –                         | –                        |       |  |
|               | chlorobenzene   | –                           | –                           | ~700                       | –      | –                      | –                           | –                 | –                                | –                         | –                        |       |  |
|               | $\text{CHCl}_3$ | –                           | –                           | ~710                       | –      | –                      | –                           | –                 | –                                | –                         | –                        |       |  |
|               | ethyl acetate   | –                           | –                           | ~410                       | –      | –                      | –                           | –                 | –                                | –                         | –                        |       |  |
|               | THF             | –                           | –                           | ~410, 690                  | –      | –                      | –                           | –                 | –                                | –                         | –                        |       |  |
| 32            | DCM             | 513                         | –                           | 600                        | –      | –                      | –                           | 3.6 $\mu\text{s}$ | –                                | –0.99                     | +0.78                    |       |  |
|               | DMF             | –                           | –                           | ~450                       | –      | –                      | –                           | –                 | –                                | –                         | –                        |       |  |
|               | toluene         | –                           | –                           | ~410, 500                  | –      | –                      | –                           | –                 | –                                | –                         | –                        |       |  |
|               | dioxane         | –                           | –                           | ~520                       | –      | –                      | –                           | –                 | –                                | –                         | –                        |       |  |
|               | chlorobenzene   | –                           | –                           | ~670                       | –      | –                      | –                           | –                 | –                                | –                         | –                        |       |  |
|               | $\text{CHCl}_3$ | –                           | –                           | ~680                       | –      | –                      | –                           | –                 | –                                | –                         | –                        |       |  |
|               | ethyl acetate   | –                           | –                           | ~620                       | –      | –                      | –                           | –                 | –                                | –                         | –                        |       |  |
| 33            | THF             | –                           | –                           | ~620                       | –      | –                      | –                           | –                 | –                                | –                         | –                        |       |  |
|               | DCM             | 433                         | –                           | 620                        | –      | –                      | –                           | 3.0 $\mu\text{s}$ | –                                | –0.95                     | +1.44                    |       |  |
|               | DMF             | –                           | –                           | ~700                       | –      | –                      | –                           | –                 | –                                | –                         | –                        |       |  |
|               | toluene         | 456                         | –                           | 581                        | –      | –                      | –                           | –                 | –                                | –                         | –                        |       |  |
|               | dioxane         | 443                         | –                           | 615                        | –      | –                      | –                           | –                 | –                                | –                         | –                        |       |  |
|               | chlorobenzene   | 470                         | –                           | 646                        | < 6 ns | –                      | –                           | –                 | –                                | –                         | –                        |       |  |
|               | $\text{CHCl}_3$ | 473                         | –                           | 667                        | –      | –                      | –                           | –                 | –                                | –                         | –                        |       |  |
| 34            | ethyl acetate   | 440                         | –                           | 679                        | –      | –                      | –                           | –                 | –                                | –                         | –                        |       |  |
|               | THF             | 447                         | –                           | 686                        | –      | –                      | –                           | –                 | –                                | –                         | –                        |       |  |
|               | DCM             | 470                         | –                           | 701                        | –      | –                      | 0.027 ns, 2.8 $\mu\text{s}$ | –                 | 43 ps, 2 ns, 2.9 $\mu\text{s}$   | –                         | –                        |       |  |
|               | toluene         | 494                         | –                           | 554                        | –      | –                      | –                           | –                 | –                                | –                         | –                        |       |  |
|               | dioxane         | 485                         | –                           | 601                        | –      | –                      | –                           | –                 | –                                | –                         | –                        |       |  |
|               | chlorobenzene   | 495                         | –                           | 660                        | < 6 ns | –                      | –                           | –                 | –                                | –                         | –                        |       |  |
|               | $\text{CHCl}_3$ | 504                         | –                           | 675                        | –      | –                      | –                           | –                 | –                                | –                         | –                        |       |  |
| 35            | ethyl acetate   | 476                         | –                           | 641                        | –      | –                      | –                           | –                 | –                                | –                         | –                        |       |  |
|               | THF             | 479                         | –                           | 646                        | –      | –                      | –                           | –                 | –                                | –                         | –                        |       |  |
|               | DCM             | 491                         | –                           | 685                        | –      | –                      | 0.03 ns, 3.9 $\mu\text{s}$  | –                 | 28 ps, 1.5 ns, 2.2 $\mu\text{s}$ | –                         | –                        |       |  |
|               | DMF             | 477                         | –                           | 714                        | –      | –                      | –                           | –                 | –                                | –                         | –                        |       |  |
|               | DCM             | 443                         | –                           | –                          | –      | –                      | 2.1 $\mu\text{s}$           | –                 | 1.28 $\mu\text{s}$               | –0.97                     | +1.00                    |       |  |
|               | chlorobenzene   | –                           | –                           | ~610                       | < 6 ns | –                      | –                           | –                 | –                                | –                         | –                        |       |  |
|               | 36              | DCM                         | 413                         | –                          | –      | –                      | –                           | 1.2 $\mu\text{s}$ | –                                | 950 ns                    | –0.97                    | +0.97 |  |
| chlorobenzene |                 | –                           | –                           | ~620                       | < 6 ns | –                      | –                           | –                 | –                                | –                         | –                        |       |  |
| 37            | DCM             | 505                         | –                           | –                          | –      | –                      | 3.2 $\mu\text{s}$           | –                 | –                                | –0.91                     | +1.06                    |       |  |

| complex | medium               | $\lambda_{\text{abs}}$ (nm) | $\lambda_{\text{exc}}$ (nm) | $\lambda_{\text{PL}}$ (nm) | $\tau$        | $\Phi_{\text{PL}}$ (%) | TA $\tau$  | TE $\tau$ | TRIR $\tau$          | $E_{\text{red}}$ peak [V] | $E_{\text{ox}}$ peak [V] | Ref. |
|---------|----------------------|-----------------------------|-----------------------------|----------------------------|---------------|------------------------|------------|-----------|----------------------|---------------------------|--------------------------|------|
| 38      | chlorobenzene        | –                           | –                           | ~725                       | < 6 ns        | –                      | –          | –         | –                    | –                         | –                        |      |
|         | DCM                  | 505                         | –                           | –                          | –             | –                      | 800 ns     | –         | 1.28 $\mu$ s         | -0.95                     | +0.94                    |      |
| 39      | chlorobenzene        | –                           | –                           | ~610                       | < 6 ns        | –                      | –          | –         | –                    | –                         | –                        |      |
|         | DCM                  | 420                         | –                           | –                          | –             | –                      | 600 ns     | –         | 800 ns               | -0.86                     | +1.00                    |      |
| 40      | chlorobenzene        | –                           | –                           | ~450, 630                  | < 6 ns        | –                      | –          | –         | –                    | –                         | –                        | 103  |
|         | DCM                  | –                           | –                           | –                          | –             | –                      | –          | –         | –                    | -1.907                    | +0.525, +0.970           |      |
|         | CHCl <sub>3</sub>    | 294, 374, 398sh, 468        | 460                         | 600                        | 1.001 $\mu$ s | 14.5                   | –          | –         | –                    | –                         | –                        |      |
|         | solid                | –                           | 450                         | 685                        | 260 ns        | 2.3                    | –          | –         | –                    | –                         | –                        |      |
|         | EtOH:MeOH (1:4) 77 K | –                           | 445                         | 556                        | 741.2 $\mu$ s | –                      | –          | –         | –                    | –                         | –                        |      |
|         | MeCN                 | 274, 361, 441               | –                           | –                          | –             | –                      | –          | –         | –                    | –                         | –                        |      |
| 41      | DCM                  | 227, 368, 424               | –                           | 592                        | 204 ns        | 12.0                   | –          | –         | –                    | –                         | –                        | 104  |
| 42      | DCM                  | 279, 303, 422               | –                           | 596                        | 271 ns        | 18.0                   | –          | –         | –                    | –                         | –                        |      |
| 43      | DCM                  | 286, 366, 434               | –                           | 598                        | 248 ns        | 9.0                    | –          | –         | –                    | –                         | –                        |      |
| 44      | DCM                  | ~260, 290, 340, 430         | –                           | –                          | –             | –                      | –          | –         | –                    | –                         | –                        | 105  |
|         | solid (CBP film)     | –                           | 266                         | 375                        | 0.2 $\mu$ s   | –                      | –          | –         | –                    | –                         | –                        |      |
| 45      | CHCl <sub>3</sub>    | 295, 345, 437               | –                           | ~580                       | –             | –                      | –          | –         | –                    | –                         | –                        | 106  |
|         | solid                | –                           | –                           | –                          | 0.16 $\mu$ s  | –                      | –          | –         | –                    | –                         | –                        |      |
| 46      | DCM                  | 295, 399                    | –                           | 573                        | <10 ns        | 3.7                    | 10 $\mu$ s | –         | 8 ps, 140 ps, 440 ns | –                         | –                        | 107  |
|         | DMF                  | –                           | –                           | –                          | –             | –                      | –          | –         | –                    | -1.58irr                  | +1.07, +1.56irr          |      |

**Table S4.** The spectroscopic and electrochemical properties of complexes **47–58**.

| complex | medium               | $\lambda_{\text{abs}}$ (nm) | $\lambda_{\text{exc}}$ (nm) | $\lambda_{\text{PL}}$ (nm) | $\tau$         | $\phi_{\text{PL}}$ (%) | TA $\tau$                            | TRIR $\tau$ | $E_{\text{red, peak}}$ [V] | $E_{\text{ox, peak}}$ [V] | Ref.   |
|---------|----------------------|-----------------------------|-----------------------------|----------------------------|----------------|------------------------|--------------------------------------|-------------|----------------------------|---------------------------|--------|
| 47      | CHCl <sub>3</sub>    | 280, 292sh, 326, 335, 390   | 395, 332, 274               | 588                        | 336.8 ns       | 8.08                   | –                                    | –           | –                          | –                         | 31     |
|         | MeCN                 | 276, 292sh, 319, 381        | 393, 326, 267               | 607                        | 178.6 ns       | 2.05                   | –                                    | –           | –                          | –                         |        |
|         | EtOH:MeOH (4:1) 77 K | –                           | 393, 331, 268               | 527, 552sh                 | 41.8 $\mu$ s   | –                      | –                                    | –           | –                          | –                         |        |
|         | solid                | –                           | 439                         | 565                        | 3.1 $\mu$ s    | 16.93                  | –                                    | –           | –                          | –                         |        |
|         | solid (film)         | 324, 400                    | 366, 272                    | 416, 434, 524              | –              | –                      | –                                    | –           | –                          | –                         |        |
|         | DCM                  | –                           | –                           | –                          | –              | –                      | –                                    | –           | –2.05, –2.31               | +0.69, +0.85, +1.04       |        |
| 48      | MeCN                 | 191, 248, 308, 414          | 257, 315, 365, 458          | 702                        | 0.079 ns       | 0.36                   | 774 ns                               | –           | –1.84, –2.07, –2.23        | +0.58, +0.81              | 108    |
|         | CHCl <sub>3</sub>    | 247, 307, 421               | 289, 329, 404               | 507                        | 3.74 ns        | 0.14                   | 84 ns                                | –           | –                          | –                         |        |
|         |                      |                             | 265, 303, 369, 432          | 617                        | 40.15 ns       |                        |                                      |             |                            |                           |        |
|         | solid                | –                           | 302, 351, 522               | 625                        | 2.28 $\mu$ s   | 1.29                   | –                                    | –           | –                          | –                         |        |
|         | EtOH:MeOH (4:1) 77 K | –                           | 319, 429                    | 588                        | 240.93 $\mu$ s | –                      | –                                    | –           | –                          | –                         |        |
|         | solid (film)         | 312, 401                    | 330                         | 384, 575                   | –              | 1.65                   | –                                    | –           | –                          | –                         |        |
|         |                      |                             | 370                         | 415, 438                   | –              |                        |                                      |             |                            |                           |        |
| 49      | MeCN                 | 246, 305, 364, 404          | 445                         | 698                        | 23.00 ns       | 0.8                    | –                                    | –           | –1.74                      | +0.52                     | 95     |
|         | CHCl <sub>3</sub>    | 249, 307, 418               | 358                         | 510                        | 4.1 ns         | 1.0                    | –                                    | –           | –                          | –                         |        |
|         |                      |                             | 417                         | 634                        | 16.60 ns       | 0.8                    | –                                    | –           | –                          | –                         |        |
|         | solid                | –                           | 536                         | 653                        | 105.43 ns      | 0.4                    | –                                    | –           | –                          | –                         |        |
|         | EtOH:MeOH (4:1) 77 K | –                           | 435                         | 585                        | 228.43 $\mu$ s | –                      | –                                    | –           | –                          | –                         |        |
|         | solid (film)         | 401                         | 324                         | 378, 531                   | –              | –                      | –                                    | –           | –                          | –                         |        |
| 50      | MeCN                 | 248, 307, 398               | 420                         | 661                        | 37.72 ns       | 1.0                    | –                                    | –           | –1.75                      | +0.64                     |        |
|         | CHCl <sub>3</sub>    | 247, 307, 403               | 404                         | 650                        | 9.42 ns        | 0.6                    | –                                    | –           | –                          | –                         |        |
|         | solid                | –                           | 470                         | 571                        | 5.35 $\mu$ s   | 8.7                    | –                                    | –           | –                          | –                         |        |
|         | EtOH:MeOH (4:1) 77 K | –                           | 419                         | 570                        | 190.23 $\mu$ s | –                      | –                                    | –           | –                          | –                         |        |
|         | solid (film)         | 418                         | 323                         | 374, 527                   | –              | –                      | –                                    | –           | –                          | –                         |        |
| 51      | CHCl <sub>3</sub>    | 405                         | 405                         | 645                        | 8 ns           | 0.9                    | –                                    | –           | –                          | –                         | 95,109 |
|         | THF                  | 405                         | 405                         | 665                        | 6 ns           | 1.0                    | –                                    | –           | –                          | –                         |        |
|         | MeCN                 | 402                         | 405                         | 665                        | 146 ns         | 0.1                    | –                                    | –           | –                          | –                         |        |
|         | DMF                  | 409                         | 409                         | 650                        | 248 ns         | <0.1                   | –                                    | –           | –                          | –                         |        |
|         | EtOH:MeOH (4:1) 77 K | –                           | 420                         | 560                        | 178 $\mu$ s    | –                      | –                                    | –           | –                          | –                         |        |
|         | solid                | –                           | 475                         | 613                        | 553 ns         | 7.1                    | –                                    | –           | –                          | –                         |        |
| 52      | CHCl <sub>3</sub>    | 247, 313, 380, 430          | 425                         | 637                        | 20.00 ns       | 1.3                    | 170 fs, 10.75 ps, 145.59 ps, 3.67 ns | –           | –                          | –                         | 110    |
|         | THF                  | 415                         | 415                         | 650                        | 46.64 ns       | 4.5                    | –                                    | –           | –                          | –                         |        |
|         | MeCN                 | 192, 246, 309, 354, 419     | 456                         | 687                        | 177.60 ns      | 2.0                    | 340 fs, 3.06 ps, 64.45 ps            | –           | –1.76                      | +0.54                     |        |
|         | DMF                  | 425                         | 425                         | 680                        | 1.67 $\mu$ s   | <0.1                   | –                                    | –           | –                          | –                         |        |
|         | EtOH:MeOH (4:1) 77 K | –                           | 444                         | 580                        | 227.64 $\mu$ s | –                      | –                                    | –           | –                          | –                         |        |
|         | solid                | –                           | 494                         | 636                        | 1.37 $\mu$ s   | 0.7                    | –                                    | –           | –                          | –                         |        |
|         | DMF                  | 425                         | –                           | 532                        | 380 ns         | –                      | –                                    | 380 ns      | –1.81                      | –                         |        |
|         | 77K 2-MeTHF          | –                           | –                           | 560                        | –              | –                      | –                                    | –           | –                          | –                         |        |
| 53      | CHCl <sub>3</sub>    | 247, 313, 380sh, 430        | 421                         | 636                        | 20.16 ns       | 1.13                   | –                                    | –           | –                          | –                         | 111    |
|         | MeCN                 | 192, 246, 309, 354, 419     | 452                         | 687                        | 0.26 ns        | 1.91                   | –                                    | –           | –                          | –                         |        |
|         | solid                | –                           | 494                         | 636                        | 1.35 $\mu$ s   | 0.67                   | –                                    | –           | –                          | –                         |        |
|         | EtOH:MeOH (4:1) 77 K | –                           | 312, 325, 368, 444          | 580                        | 227.98 $\mu$ s | –                      | –                                    | –           | –                          | –                         |        |
| 53      | CHCl <sub>3</sub>    | 270, 322, 339, 351, 425     | 268, 292sh, 323, 430        | 590                        | 7.07 $\mu$ s   | 6.43                   | –                                    | –           | –                          | –                         | 31     |

| complex | medium               | $\lambda_{\text{abs}}$ (nm) | $\lambda_{\text{exc}}$ (nm) | $\lambda_{\text{PL}}$ (nm) | $\tau$         | $\Phi_{\text{PL}}$ (%) | TA $\tau$                  | TRIR $\tau$ | $E_{\text{red, peak}}$ [V] | $E_{\text{ox, peak}}$ [V] | Ref. |
|---------|----------------------|-----------------------------|-----------------------------|----------------------------|----------------|------------------------|----------------------------|-------------|----------------------------|---------------------------|------|
|         | MeCN                 | 271, 416                    | 264, 292, 318, 419          | 643                        | 489.8 ns       | 2.48                   | –                          | –           | –                          | –                         |      |
|         | EtOH:MeOH (4:1) 77 K | –                           | 293, 322, 439               | 567, 604sh                 | 200.88 $\mu$ s | –                      | –                          | –           | –                          | –                         |      |
|         | solid                | –                           | 331, 494                    | 595                        | 25.24 $\mu$ s  | 34.77                  | –                          | –           | –                          | –                         |      |
|         | solid (film)         | 421                         | 339                         | 412, 585                   | –              | –                      | –                          | –           | –                          | –                         |      |
|         | DCM                  | –                           | –                           | –                          | –              | –                      | –                          | –           | –1.81, –2.13               | +0.78                     |      |
| 54      | EtOH:MeOH (4:1) 77 K | –                           | 382                         | 499, 535, 577              | 278.56 $\mu$ s | –                      | –                          | –           | –                          | –                         |      |
|         | CHCl <sub>3</sub>    | 264, 313, 377               | 408                         | 564                        | 5.44 $\mu$ s   | 2.83                   | 4.23 ps, 77.26 ps          | –           | –                          | –                         |      |
|         | MeCN                 | 252, 276, 310, 378          | 390                         | 557                        | 1.32 $\mu$ s   | 0.51                   | –                          | –           | –                          | –                         |      |
|         | solid                | –                           | 450                         | 600                        | 4.67 $\mu$ s   | 2.43                   | –                          | –           | –                          | –                         |      |
| 55      | EtOH:MeOH (4:1) 77 K | –                           | 377                         | 496, 532, 572              | 216.42 $\mu$ s | –                      | –                          | –           | –                          | –                         |      |
|         | CHCl <sub>3</sub>    | 267, 312, 371               | 370                         | 581                        | 5.69 $\mu$ s   | 4.30                   | 4.26 ps, 45.93 ps          | –           | –                          | –                         |      |
|         | MeCN                 | 254, 273, 312, 371          | 370                         | 575                        | 2.86 $\mu$ s   | 0.64                   | –                          | –           | –                          | –                         |      |
|         | solid                | –                           | 460                         | 650                        | 1.99 $\mu$ s   | <0.05                  | –                          | –           | –                          | –                         |      |
| 56      | EtOH:MeOH (4:1) 77 K | –                           | 380                         | 498, 537, 578              | 210.11 $\mu$ s | –                      | –                          | –           | –                          | –                         |      |
|         | CHCl <sub>3</sub>    | 267, 314, 371               | 375                         | 582                        | 6.67 $\mu$ s   | 1.95                   | 5.29 ps, 103.32 ps         | –           | –                          | –                         |      |
|         | MeCN                 | 258, 312, 370               | 395                         | 578                        | 4.73 $\mu$ s   | 0.58                   | –                          | –           | –                          | –                         |      |
|         | solid                | –                           | 425                         | 572                        | 2.60 $\mu$ s   | 1.89                   | –                          | –           | –                          | –                         |      |
| 57      | DCM                  | 499                         | –                           | –                          | –              | –                      | 6.1 $\mu$ s                | 2.3 $\mu$ s | –1.06                      | +1.19                     | 102  |
|         | chlorobenzene        | –                           | –                           | ~470, 625                  | –              | –                      | –                          | –           | –                          | –                         |      |
| 58      | CHCl <sub>3</sub>    | 296, 355, 391sh, 473        | 470                         | 623                        | 1.16 $\mu$ s   | 19.5                   | –                          | –           | –                          | –                         |      |
|         | MeCN                 | 287, 305, 342, 447          | –                           | –                          | –              | –                      | –                          | –           | –                          | –                         |      |
|         | DMF                  | 290, 310, 349, 457          | –                           | –                          | –              | –                      | –                          | –           | –                          | –                         |      |
|         | THF                  | 292, 308, 343, 444          | –                           | –                          | –              | –                      | 900 fs, 6.32 ps, 141.31 ps | –           | –                          | –                         |      |
|         | solid                | –                           | 450                         | 650                        | 0.117 $\mu$ s  | 4.8                    | –                          | –           | –                          | –                         |      |
|         | EtOH:MeOH (4:1) 77 K | –                           | 458                         | 584                        | 1.18 ms        | –                      | –                          | –           | –                          | –                         |      |
|         | DCM                  | –                           | –                           | –                          | –              | –                      | –                          | –           | –1.917                     | +0.438                    |      |

**Table S5.** The spectroscopic and electrochemical properties of complexes **59–71**.

| complex                  | medium               | $\lambda_{\text{abs}}$ (nm)   | $\lambda_{\text{exc}}$ (nm) | $\lambda_{\text{PL}}$ (nm) | $\tau$        | $\phi_{\text{PL}}$ (%) | TA $\tau$                            | $E_{\text{red, peak}}$ [V] | $E_{\text{ox, peak}}$ [V] | Ref. |   |
|--------------------------|----------------------|-------------------------------|-----------------------------|----------------------------|---------------|------------------------|--------------------------------------|----------------------------|---------------------------|------|---|
| 59                       | CHCl <sub>3</sub>    | 260, 292, 333, 407            | 395                         | 675                        | 8.21 ns       | 0.22                   | –                                    | –                          | –                         | 113  |   |
|                          | MeCN                 | 194, 258, 321, 381            | 380                         | 664                        | 5.57 ns       | 0.22                   | –                                    | –1.35, –1.70               | +0.72, +1.07              |      |   |
|                          | solid                | –                             | 458                         | 604                        | 430.59 ns     | 3.50                   | –                                    | –                          | –                         |      |   |
|                          | EtOH:MeOH (4:1) 77 K | –                             | 307, 338, 369               | 525, 565                   | 69.15 $\mu$ s | –                      | –                                    | –                          | –                         |      |   |
|                          | solid (film)         | 397                           | 350                         | 415, 438, 556              | –             | –                      | –                                    | –                          | –                         |      |   |
|                          |                      |                               | 400                         | 440, 465, 587              | –             | –                      | –                                    | –                          | –                         |      |   |
| solid (15% blend in PVK) | 330, 345, 397        | 350                           | 416, 440, 572               | –                          | –             | –                      | –                                    | –                          |                           |      |   |
|                          |                      | 400                           | 463, 558                    | –                          | –             | –                      | –                                    | –                          |                           |      |   |
| 60                       | CHCl <sub>3</sub>    | 260, 327, 428                 | 400                         | 484                        | 2.40 ns       | 0.15                   | –                                    | –                          | –                         | 114  |   |
|                          | MeCN                 | 220, 257, 314, 406            | 371                         | 516                        | 3.14 ns       | 0.09                   | –                                    | –1.37, –1.70               | +0.71, +1.06              |      |   |
|                          | solid                | –                             | 500                         | 689                        | 24.41 $\mu$ s | 1.19                   | –                                    | –                          | –                         |      | – |
|                          |                      |                               |                             | 758                        | 21.40 $\mu$ s |                        |                                      |                            |                           |      |   |
| EtOH:MeOH (4:1) 77 K     | –                    | 301, 374                      | 410, 434, 467               | 1.01 ns                    | –             | –                      | –                                    | –                          |                           |      |   |
| 61                       | DCM                  | 330, 442                      | 351                         | 502                        | –             | 0.6                    | 1.4 $\mu$ s                          | –0.94                      | +1.46                     | 114  |   |
|                          | toluene              | –                             |                             | ~420, 510                  | –             | –                      | –                                    | –                          | –                         |      |   |
|                          | CHCl <sub>3</sub>    | –                             |                             | ~450, 520                  | –             | –                      | –                                    | –                          | –                         |      |   |
|                          | DMSO                 | –                             |                             | ~480, 590                  | –             | –                      | –                                    | –                          | –                         |      |   |
|                          | acetone              | –                             |                             | ~450, 575                  | –             | –                      | –                                    | –                          | –                         |      |   |
|                          | MeCN                 | –                             |                             | ~480, 575                  | –             | –                      | –                                    | –                          | –                         |      |   |
| 62                       | DCM                  | 350, 474                      | 351                         | 656                        | –             | 5.0                    | 1200 ns                              | –0.92                      | +1.26                     | 114  |   |
|                          | toluene              | –                             |                             | ~590                       | –             | –                      | –                                    | –                          | –                         |      |   |
|                          | CHCl <sub>3</sub>    | –                             |                             | ~640                       | –             | –                      | –                                    | –                          | –                         |      |   |
|                          | DMSO                 | –                             |                             | ~660                       | –             | –                      | –                                    | –                          | –                         |      |   |
|                          | acetone              | –                             |                             | ~685                       | –             | –                      | –                                    | –                          | –                         |      |   |
|                          | MeCN                 | –                             |                             | ~675                       | –             | –                      | –                                    | –                          | –                         |      |   |
| 63                       | DCM                  | 375, 492                      | 351                         | 697                        | –             | 7.0                    | 2500 ns                              | –0.92                      | +1.04                     | 114  |   |
|                          | toluene              | –                             |                             | ~625                       | –             | –                      | –                                    | –                          | –                         |      |   |
|                          | CHCl <sub>3</sub>    | –                             |                             | ~697                       | –             | –                      | –                                    | –                          | –                         |      |   |
| 64                       | DMSO                 | 261, 324, 350, 415            | –                           | 564                        | –             | –                      | –                                    | –                          | –                         | 115  |   |
|                          | MeCN                 | –                             | –                           | –                          | –             | –                      | –                                    | –0.73                      | +1.23                     |      |   |
| 65                       | DCM                  | ~380, 450                     | 400                         | 500                        | –             | 0.57                   | –                                    | –0.95, –1.46               | +0.2, +0.83               | 116  |   |
|                          | solid (ITO film)     | ~380, 488, 600                | –                           | –                          | –             | –                      | –                                    | –                          | –                         |      |   |
| 66                       | PBS buffer           | ~260, 300, 422                | 425                         | 685                        | –             | 0.04                   | –                                    | –                          | –                         | 117  |   |
|                          | DCM                  | ~260, 300, 410                |                             | 691                        | –             | 0.03                   | 1.2 $\mu$ s                          | –                          | –                         |      |   |
|                          | MeCN                 | ~260, 300, 408                |                             | 493                        | –             | 0.01                   | –                                    | –                          | –                         |      |   |
| 67                       | DCM                  | 291, 335, 417sh, 439          | –                           | –                          | –             | –                      | –                                    | –0.75                      | –                         | 46   |   |
| 68                       | DCM                  | 294, 321, 424sh, 447          | –                           | –                          | –             | –                      | –                                    | –1.03                      | –                         | –    |   |
| 69                       | DMF                  | ~480, 560                     | –                           | –                          | –             | –                      | –                                    | –                          | –                         | 118  |   |
|                          | DCM                  | ~200, 250, 300, 325, 375, 580 | 560                         | –                          | –             | –                      | <100 ps                              | –1.41                      | +0.28, +0.62              |      |   |
| 70                       | DCM                  | ~260, 330                     | –                           | –                          | 214 ns        | –                      | –                                    | –                          | –                         | 119  |   |
| 71                       | CHCl <sub>3</sub>    | 253, 280, 302, 425            | 420                         | 785                        | 150 ns        | 0.81                   | 0.17 ps, 2.78 ps, 84.9 ps, 684.13 ps | –                          | –                         | 112  |   |
|                          | MeCN                 | 252, 278, 296, 317, 406       | –                           | –                          | –             | –                      | –                                    | –                          | –                         |      |   |
|                          | solid                | –                             | 525                         | 725                        | 130 ns        | 2.31                   | –                                    | –                          | –                         |      |   |
|                          | EtOH:MeOH (4:1) 77 K | –                             | 425                         | 665                        | 2.08 $\mu$ s  | –                      | –                                    | –                          | –                         |      |   |



**Table S6.** The spectroscopic and electrochemical properties of complexes **72–86**.

| complex                      | medium                       | $\lambda_{\text{abs}}$ (nm)         | $\lambda_{\text{exc}}$ (nm) | $\lambda_{\text{PL}}$ (nm) | $\tau$              | $\phi_{\text{PL}}$ (%) | TA $\tau$                                  | $E_{\text{red, peak}}$ [V] | $E_{\text{ox, peak}}$ [V] | Ref. |   |
|------------------------------|------------------------------|-------------------------------------|-----------------------------|----------------------------|---------------------|------------------------|--------------------------------------------|----------------------------|---------------------------|------|---|
| 72                           | DCM                          | 252, 296, 366                       | 420                         | 570                        | 420 ns              | –                      | –                                          | –                          | –                         | 120  |   |
|                              |                              |                                     |                             | 688                        | 6 $\mu\text{s}$     |                        |                                            |                            |                           |      |   |
|                              |                              |                                     |                             | 764                        | 23 $\mu\text{s}$    |                        |                                            |                            |                           |      |   |
| 73                           | DCM                          | 258, 296, 380                       | 420                         | 592                        | 210 ns              | –                      | –                                          | –                          | –                         | 121  |   |
|                              |                              |                                     |                             | 700                        | 15 $\mu\text{s}$    |                        |                                            |                            |                           |      |   |
|                              |                              |                                     |                             | 776                        | 65 $\mu\text{s}$    |                        |                                            |                            |                           |      |   |
| 74                           | DCM                          | ~260, 350, 370, 385                 | 380                         | ~540                       | 15 ns               | –                      | –                                          | –                          | –                         | 121  |   |
| 75                           | DCM                          | ~260, 350, 370, 385                 | –                           | ~540                       | 40 ns               | –                      | 42 $\mu\text{s}$                           | –                          | –                         | –    |   |
| 76                           | DMF                          | ~325, 350, 380, 395                 | 375                         | ~410, 425                  | 0.141 ns            | –                      | 117.7 $\mu\text{s}$                        | –1.69, –1.97, –2.45        | –                         | 122  |   |
| 77                           | MeCN                         | 382, 402                            | 402                         | 674                        | –                   | –                      | 11 $\mu\text{s}$                           | –1.32                      | +0.96, +1.4               | 123  |   |
|                              | DMSO                         | 407                                 | 402                         | 680                        | –                   | –                      | –                                          | –                          | –                         |      |   |
|                              | DCM                          | 407                                 | –                           | –                          | –                   | –                      | –                                          | –                          | –                         |      |   |
|                              | EtOH:MeOH (4:1) 77 K         | –                                   | 402                         | ~645, 710                  | ~2 ms               | –                      | –                                          | –                          | –                         |      |   |
| 78                           | DMSO:H <sub>2</sub> O (2:98) | ~320, 420                           | 380                         | ~450                       | –                   | –                      | –                                          | –                          | –                         | 124  |   |
|                              | CHCl <sub>3</sub>            | 258, 308, 351, 368, 386, 416        | 445                         | 511                        | 4.91 ns             | 3.85                   | 1.53 ps, 92.9 ps, 1.96 ns                  | –                          | –                         | 125  |   |
|                              | MeCN                         | 252, 311, 348, 365, 384, 407        | 430                         | 627                        | 2.26 ns             | 4.08                   | 1.93 ps, 52.0 ps, 1.73 ns                  | –                          | –                         |      |   |
|                              | DMSO                         | 260, 316, 328, 349, 368, 388, 406   | 430                         | 627                        | 2.83 ns             | 0.02                   | 2.18 ps, 269.6 ps, 1.62 ns                 | –                          | –                         |      |   |
|                              | solid (film)                 | 321sh, 370, 392, 456                | –                           | 711                        | 14.28 $\mu\text{s}$ |                        |                                            |                            |                           |      |   |
|                              | 77 K BuCN                    | –                                   | 430                         | 587                        | 3.6 $\mu\text{s}$   | –                      | –                                          | –                          | –                         |      |   |
|                              | DCM                          | –                                   | –                           | 688, 761                   | 12 ms               | –                      | –                                          | –1.76                      | +0.67                     |      |   |
|                              | 79                           | CHCl <sub>3</sub>                   | 259, 312, 423               | 450                        | 580                 | 7.30 ns                | 1.78                                       | 0.58 ps, 168.8 ps          | –                         |      | – |
| MeCN                         |                              | 250, 292, 305, 412                  | 430                         | 609                        | 3.97 ns             | 0.05                   | 0.18 ps, 105.1 ps                          | –                          | –                         |      |   |
| DMSO                         |                              | 262, 312, 360, 421                  | 430                         | 593                        | 5.75 ns             | 1.40                   | 0.29 ps, 465.3 ps                          | –                          | –                         |      |   |
| solid (film)                 |                              | 326sh, 450                          | –                           | 712                        | 22.71 $\mu\text{s}$ |                        |                                            |                            |                           |      |   |
| BuCN 77 K                    |                              | –                                   | 470                         | 707, 784                   | 2.6 ms              | –                      | –                                          | –                          | –                         |      |   |
| DCM                          |                              | –                                   | –                           | –                          | –                   | –                      | –                                          | –1.69                      | +0.61                     |      |   |
| DMSO:H <sub>2</sub> O (2:98) |                              | ~320, 475, 490                      | 380                         | ~440                       | –                   | –                      | –                                          | –                          | –                         |      |   |
| 80                           | MeCN                         | 272, 324, 395                       | 420                         | 620                        | 3.3 ns              | 6.1                    | –                                          | –                          | –                         | 126  |   |
|                              | CHCl <sub>3</sub>            | 274, 306, 321, 409                  | 450                         | 500                        | 4.65 ns             | <0.1                   | 0.41 ps, 8.6 ps, 136 ps, 4.6 $\mu\text{s}$ | –                          | –                         |      |   |
|                              | solid (film)                 | 304, 338, 429                       | –                           | 650, 696sh                 | 4.404 ns            |                        |                                            |                            |                           |      |   |
|                              | BuCN 77 K                    | –                                   | 440                         | 627, 680, 756              | 5.7 ms              | –                      | –                                          | –                          | –                         |      |   |
|                              | DCM                          | –                                   | –                           | –                          | –                   | –                      | –                                          | –1.65, –1.97               | +0.71, +0.97              |      |   |
|                              | DMSO:PBS buffer (1:99)       | 300, ~440                           | 300                         | 410                        | –                   | 0.24                   | –                                          | –                          | –                         |      |   |
| 82                           | DMSO:H <sub>2</sub> O (1:9)  | 280, 377                            | 280                         | 403, 466                   | –                   | 15.4                   | –                                          | –                          | –                         | 128  |   |
|                              | DMSO                         | 285, 299, 374, 429                  | 377                         | 468                        | –                   | 22.5                   | 1.03 ps, 20.37 ps, 379.80 ps               | –                          | –                         |      |   |
|                              |                              |                                     | 375                         | 460                        | 1.77 ns             |                        |                                            |                            |                           |      |   |
|                              |                              |                                     | 435                         | 657, 720, 790              | 1.80 ms             |                        |                                            |                            |                           |      |   |
|                              | EtOH:MeOH (4:1) 77 K         | –                                   | –                           | 375                        | 405, 430, 450, 494  | 9.49 ns                | –                                          | –                          | –                         | 88   |   |
| DCM                          | –                            | –                                   | 370                         | 631, 691, 762              | 169.67 ms           | –                      | –                                          | –                          |                           |      |   |
| 83                           | DMSO                         | 269, 280, 301, 331, 347, 375, 407   | 375                         | 450                        | 2.12 ns             | 1.06                   | 1.64 ps, 66.94 ps, 597.35 ps               | –                          | –                         |      |   |
|                              | EtOH:MeOH (4:1) 77 K         | –                                   | 420                         | 636                        | 1.51 ms             |                        |                                            |                            |                           |      |   |
| 84                           | DMF                          | ~330, 350, 376                      | –                           | ~410, 610, 660             | 12.1 ns             | –                      | 77.4 $\mu\text{s}$                         | –1.64                      | –                         | 129  |   |
|                              | DMF 77 K                     | –                                   | –                           | ~600, 660                  | –                   | –                      | –                                          | –                          | –                         |      |   |
| 85                           | DCM                          | 258, 336, 346, 373, 393             | 370                         | 395, 418, 440              | –                   | ~0.01                  | –                                          | –1.94irr                   | +0.96irr, +1.33irr        | 130  |   |
| 86                           | DCM                          | 244, 267, 278, 317, 331, 347, 400sh |                             | 400                        | –                   | –                      | ~0.01                                      | –                          | –1.82                     | –    |   |

## Supplementary References

- 1 M. J. Frisch, G. W. Trucks, H. B. Schlegel, G. E. Scuseria, M. A. Robb, J. R. Cheeseman, G. Scalmani, V. Barone, G. A. Petersson, H. Nakatsuji, X. Li, M. Caricato, A. V. Marenich, J. Bloino, B. G. Janesko, R. Gomperts, B. Mennucci, H. P. Hratchian, J. V. Ortiz, A. F. Izmaylov, J. L. Sonnenberg, D. Williams-Young, F. Ding, F. Lipparini, F. Egidi, J. Goings, B. Peng, A. Petrone, T. Henderson, D. Ranasinghe, V. G. Zakrzewski, J. Gao, N. Rega, G. Zheng, W. Liang, M. Hada, M. Ehara, K. Toyota, R. Fukuda, J. Hasegawa, M. Ishida, T. Nakajima, Y. Honda, O. Kitao, H. Nakai, T. Vreven, K. Throssell, J. A. Montgomery Jr., J. E. Peralta, F. Ogliaro, M. J. Bearpark, J. J. Heyd, E. N. Brothers, K. N. Kudin, V. N. Staroverov, T. A. Keith, R. Kobayashi, J. Normand, K. Raghavachari, A. P. Rendell, J. C. Burant, S. S. Iyengar, J. Tomasi, M. Cossi, J. M. Millam, M. Klene, C. Adamo, R. Cammi, J. W. Ochterski, R. L. Martin, K. Morokuma, O. Farkas, J. B. Foresman and D. J. Fox, *Gaussian 16 Rev. C.01* 2016.
- 2 C. Adamo and V. Barone, *J. Chem. Phys.*, 1999, **110**, 6158–6170.
- 3 M. Ernzerhof and G. E. Scuseria, *J. Chem. Phys.*, 1999, **110**, 5029–5036.
- 4 D. Andrae, U. Häußermann, M. Dolg, H. Stoll and H. Preuß, *Theor. Chim. Acta*, 1990, **77**, 123–141.
- 5 F. Weigend and R. Ahlrichs, *Phys. Chem. Chem. Phys.*, 2005, **7**, 3297–3305.
- 6 D. Rappoport and F. Furche, *J. Chem. Phys.*, 2010, **133**, 134105.
- 7 E. Cancès, B. Mennucci and J. Tomasi, *J. Chem. Phys.*, 1997, **107**, 3032–3041.
- 8 B. Mennucci and J. Tomasi, *J. Chem. Phys.*, 1997, **106**, 5151–5158.
- 9 M. Cossi, V. Barone, B. Mennucci and J. Tomasi, *Chem. Phys. Lett.*, 1998, **286**, 253–260.
- 10 J. C. Luong, R. A. Faltynek and M. S. Wrighton, *J. Am. Chem. Soc.*, 1980, **102**, 7892–7900.
- 11 K. Kalyanasundaram, *J. Chem. Soc. Faraday Trans. 2 Mol. Chem. Phys.*, 1986, **82**, 2401–2415.
- 12 L. A. Worl, R. Duesing, P. Chen, L. D. Ciana and T. J. Meyer, *J. Chem. Soc. Dalton Trans.*, 1991, 849–858.
- 13 K. Kalyanasundaram, M. Graetzel and M. K. Nazeeruddin, *Inorg. Chem.*, 1992, **31**, 5243–5253.
- 14 A. Harriman, M. Hissler, R. Ziessel, A. D. Cian and J. Fisher, *J. Chem. Soc. Dalton Trans.*, 1995, 4067–4080.
- 15 G. J. Stor, F. Hartl, J. W. M. van Outersterp and D. J. Stufkens, *Organometallics*, 1995, **14**, 1115–1131.
- 16 Y. F. Lee, J. R. Kirchhoff, R. M. Berger and D. Gosztola, *J. Chem. Soc. Dalton Trans.*, 1995, 3677–3682.
- 17 A. Klein, C. Vogler and W. Kaim, *Organometallics*, 1996, **15**, 236–244.
- 18 F. Paolucci, M. Marcaccio, C. Paradisi, S. Roffia, C. A. Bignozzi and C. Amatore, *J. Phys. Chem. B*, 1998, **102**, 4759–4769.
- 19 A. F. Stange, S. Tokura and M. Kira, *J. Organomet. Chem.*, 2000, **612**, 117–124.
- 20 P. Kurz, B. Probst, B. Spingler and R. Alberto, *Eur. J. Inorg. Chem.*, 2006, **2006**, 2966–2974.
- 21 J. P. Bullock, E. Carter, R. Johnson, A. T. Kennedy, S. E. Key, B. J. Kraft, D. Saxon and P. Underwood, *Inorg. Chem.*, 2008, **47**, 7880–7887.
- 22 H. Takeda, K. Koike, H. Inoue and O. Ishitani, *J. Am. Chem. Soc.*, 2008, **130**, 2023–2031.
- 23 J. M. Smieja and C. P. Kubiak, *Inorg. Chem.*, 2010, **49**, 9283–9289.
- 24 C. Liu, K. D. Dubois, M. E. Louis, A. S. Vorushilov and G. Li, *ACS Catal.*, 2013, **3**, 655–662.
- 25 S. A. Chabolla, E. A. Dellamary, C. W. Machan, F. A. Tezcan and C. P. Kubiak, *Inorganica Chim. Acta*, 2014, **422**, 109–113.
- 26 F. Franco, C. Cometto, C. Garino, C. Minero, F. Sordello, C. Nervi and R. Gobetto, *Eur. J. Inorg. Chem.*, 2015, **2015**, 296–304.
- 27 D.-I. Won, J.-S. Lee, J.-M. Ji, W.-J. Jung, H.-J. Son, C. Pac and S. O. Kang, *J. Am. Chem. Soc.*, 2015, **137**, 13679–13690.
- 28 C. J. I. Stanton, C. W. Machan, J. E. Vandezande, T. Jin, G. F. Majetich, H. F. I. Schaefer, C. P. Kubiak, G. Li and J. Agarwal, *Inorg. Chem.*, 2016, **55**, 3136–3144.
- 29 H. Y. V. Ching, X. Wang, M. He, N. Perujo Holland, R. Guillot, C. Slim, S. Griveau, H. C. Bertrand, C. Policar, F. Bedioui and M. Fontecave, *Inorg. Chem.*, 2017, **56**, 2966–2976.
- 30 W. Yang, S. Sinha Roy, W. C. Pitts, R. L. Nelson, F. R. Fronczek and J. W. Jurss, *Inorg. Chem.*, 2018, **57**, 9564–9575.
- 31 A. M. Maroń, A. Szlapa-Kula, M. Matussek, R. Kruszynski, M. Siwy, H. Janeczek, J. Grzelak, S. Maćkowski, E. Schab-Balcerzak and B. Machura, *Dalton Trans.*, 2020, **49**, 4441–4453.
- 32 K. Talukdar, S. Sinha Roy, E. Amatya, E. A. Sleeper, P. Le Magueres and J. W. Jurss, *Inorg. Chem.*, 2020, **59**, 6087–6099.
- 33 J.-P. Du and I. Siewert, *Z. Für Anorg. Allg. Chem.*, 2020, **646**, 705–711.
- 34 R. Giereth, P. Lang, E. McQueen, X. Meißner, B. Braun-Cula, C. Marchfelder, M. Obermeier, M. Schwalbe and S. Tschierlei, *ACS Catal.*, 2021, **11**, 390–403.
- 35 L.-Q. Qiu, Z.-W. Yang, X. Yao, X.-Y. Li and L.-N. He, *ChemSusChem*, 2022, **15**, e202200337.

- 36 M. Ertl, U. Monkowius and K. T. Oppelt, *Inorg. Chem.*, 2023, **62**, 17510–17521.
- 37 J.-Q. Song, Y.-L. Lu, S.-Z. Yi, J.-H. Zhang, M. Pan and C.-Y. Su, *Inorg. Chem.*, 2023, **62**, 12565–12572.
- 38 A. Juris, S. Campagna, I. Bidd, J. M. Lehn and R. Ziessel, *Inorg. Chem.*, 1988, **27**, 4007–4011.
- 39 A. J. Amoroso, A. Banu, M. P. Coogan, P. G. Edwards, G. Hossain and K. M. A. Malik, *Dalton Trans.*, 2010, **39**, 6993–7003.
- 40 J. C. Luong, L. Nadjo and M. S. Wrighton, *J. Am. Chem. Soc.*, 1978, **100**, 5790–5795.
- 41 P. J. Wright, S. Muzzioli, M. V. Werrett, P. Raiteri, B. W. Skelton, D. S. Silvester, S. Stagni and M. Massi, *Organometallics*, 2012, **31**, 7566–7578.
- 42 B. J. Neyhouse and T. A. White, *Inorganica Chim. Acta*, 2018, **479**, 49–57.
- 43 V. Komreddy, K. Ensz, H. Nguyen, D. P. Rillema and C. E. Moore, *J. Mol. Struct.*, 2021, **1223**, 128739.
- 44 A. V. Müller, L. A. Faustino, K. T. de Oliveira, A. O. T. Patrocínio and A. S. Polo, *ACS Catal.*, 2023, **13**, 633–646.
- 45 M. R. Waterland, K. C. Gordon, J. J. McGarvey and P. M. Jayaweera, *J. Chem. Soc. Dalton Trans.*, 1998, 609–616.
- 46 M. G. Fraser, A. G. Blackman, G. I. S. Irwin, C. P. Easton and K. C. Gordon, *Inorg. Chem.*, 2010, **49**, 5180–5189.
- 47 J. Fees, M. Ketterle, A. Klein, J. Fiedler and W. Kaim, *J. Chem. Soc. Dalton Trans.*, 1999, 2595–2600.
- 48 S. Sinha, E. K. Berdichevsky and J. J. Warren, *Inorganica Chim. Acta*, 2017, **460**, 63–68.
- 49 T. Y. Kim, A. B. S. Elliott, K. J. Shaffer, C. John McAdam, K. C. Gordon and J. D. Crowley, *Polyhedron*, 2013, **52**, 1391–1398.
- 50 W. K. C. Lo, G. S. Huff, J. R. Cubanski, A. D. W. Kennedy, C. J. McAdam, D. A. McMorran, K. C. Gordon and J. D. Crowley, *Inorg. Chem.*, 2015, **54**, 1572–1587.
- 51 J. McKiernan, J. C. Pouxviel, B. Dunn and J. I. Zink, *J. Phys. Chem.*, 1989, **93**, 2129–2133.
- 52 B. D. Rossenaar, D. J. Stufkens and A. Vlček, *Inorg. Chem.*, 1996, **35**, 2902–2909.
- 53 I. Costa, M. Montalti, P. Pallavicini, A. Perotti, L. Prodi and N. Zaccheroni, *J. Organomet. Chem.*, 2000, **593–594**, 267–273.
- 54 K. R. J. Thomas, J. T. Lin, H.-M. Lin, C.-P. Chang and C.-H. Chuen, *Organometallics*, 2001, **20**, 557–563.
- 55 M. Obata, A. Kitamura, A. Mori, C. Kameyama, J. A. Czaplewska, R. Tanaka, I. Kinoshita, T. Kusumoto, H. Hashimoto, M. Harada, Y. Mikata, T. Funabiki and S. Yano, *Dalton Trans.*, 2008, 3292–3300.
- 56 D. K. Orsa, G. K. Haynes, S. K. Pramanik, M. O. Iwunze, G. E. Greco, D. M. Ho, J. A. Krause, D. A. Hill, R. J. Williams and S. K. Mandal, *Inorg. Chem. Commun.*, 2008, **11**, 1054–1056.
- 57 A. Cannizzo, A. M. Blanco-Rodríguez, A. El Nahhas, J. Šebera, S. Zálíš, A. Jr. Vlček and M. Chergui, *J. Am. Chem. Soc.*, 2008, **130**, 8967–8974.
- 58 A. El Nahhas, A. Cannizzo, F. van Mourik, A. M. Blanco-Rodríguez, S. Zálíš, A. Jr. Vlček and M. Chergui, *J. Phys. Chem. A*, 2010, **114**, 6361–6369.
- 59 A. Boulay, M. Artigau, Y. Coulais, C. Picard, B. Mestre-Voegtlé and E. Benoist, *Dalton Trans.*, 2011, **40**, 6206–6209.
- 60 M. V. Werrett, D. Chartrand, J. D. Gale, G. S. Hanan, J. G. MacLellan, M. Massi, S. Muzzioli, P. Raiteri, B. W. Skelton, M. Silberstein and S. Stagni, *Inorg. Chem.*, 2011, **50**, 1229–1241.
- 61 X. Yi, J. Zhao, J. Sun, S. Guo and H. Zhang, *Dalton Trans.*, 2013, **42**, 2062–2074.
- 62 C. Matlachowski, B. Braun, S. Tschierlei and M. Schwalbe, *Inorg. Chem.*, 2015, **54**, 10351–10360.
- 63 F. Zhong, X. Yuan, J. Zhao and Q. Wang, *Sci. China Chem.*, 2016, **59**, 70–77.
- 64 L. D. Ramos, H. M. da Cruz and K. P. Morelli Frin, *Photochem. Photobiol. Sci.*, 2017, **16**, 459–466.
- 65 D. R. Whang, D. H. Apaydin, S. Y. Park and N. S. Sariciftci, *J. Catal.*, 2018, **363**, 191–196.
- 66 L. Suntrup, F. Stein, J. Klein, A. Wilting, F. G. L. Parlane, C. M. Brown, J. Fiedler, C. P. Berlinguette, I. Siewert and B. Sarkar, *Inorg. Chem.*, 2020, **59**, 4215–4227.
- 67 O. D. C. C. D. Azevedo, P. I. P. Elliott, C. D. Gabbutt, B. M. Heron, D. Jacquemin, C. R. Rice and P. A. Scattergood, *Dalton Trans.*, 2021, **50**, 830–834.
- 68 D. Wang, Q.-L. Xu, S. Zhang, H.-Y. Li, C.-C. Wang, T.-Y. Li, Y.-M. Jing, W. Huang, Y.-X. Zheng and G. Accorsi, *Dalton Trans.*, 2013, **42**, 2716–2723.
- 69 P. Bulsink, A. Al-Ghamdi, P. Joshi, I. Korobkov, T. Woo and D. Richeson, *Dalton Trans.*, 2016, **45**, 8885–8896.
- 70 R. Kushwaha, A. Upadhyay, S. Peters, A. K. Yadav, A. Mishra, A. Bera, T. Sadhukhan and S. Banerjee, *Langmuir*, 2024, **40**, 12226–12238.
- 71 R. N. Dominey, B. Hauser, J. Hubbard and J. Dunham, *Inorg. Chem.*, 1991, **30**, 4754–4758.
- 72 M. K. Itokazu, A. S. Polo, D. L. A. de Faria, C. A. Bignozzi and N. Y. M. Iha, *Inorganica Chim. Acta*, 2001, **313**, 149–155.
- 73 F. Li, M. Zhang, G. Cheng, J. Feng, Y. Zhao, Y. Ma, S. Liu and J. Shen, *Appl. Phys. Lett.*, 2004, **84**, 148–150.
- 74 I. E. Pomestchenko, D. E. Polyansky and F. N. Castellano, *Inorg. Chem.*, 2005, **44**, 3412–3421.

- 75 A. A. Martí, G. Mezei, L. Maldonado, G. Paralitici, R. G. Raptis and J. L. Colón, *Eur. J. Inorg. Chem.*, 2005, **2005**, 118–124.
- 76 R. C. Evans, P. Douglas and C. J. Winscom, *Coord. Chem. Rev.*, 2006, **250**, 2093–2126.
- 77 J. E. Yarnell, J. C. Deaton, C. E. McCusker and F. N. Castellano, *Inorg. Chem.*, 2011, **50**, 7820–7830.
- 78 A. El Nahhas, C. Consani, A. M. Blanco-Rodríguez, K. M. Lancaster, O. Braem, A. Cannizzo, M. Towrie, I. P. Clark, S. Záliš, M. Chergui and A. Vlček, *Inorg. Chem.*, 2011, **50**, 2932–2943.
- 79 L. D. Ramos, R. N. Sampaio, F. F. de Assis, K. T. de Oliveira, P. Homem-de-Mello, A. O. T. Patrocínio and K. P. M. Frin, *Dalton Trans.*, 2016, **45**, 11688–11698.
- 80 M. R. Gonçalves and K. P. M. Frin, *Polyhedron*, 2017, **132**, 20–27.
- 81 I. Chakraborty, J. Jimenez, W. M. C. Sameera, M. Kato and P. K. Mascharak, *Inorg. Chem.*, 2017, **56**, 2863–2873.
- 82 J. M. Jr. Favale, E. O. Danilov, J. E. Yarnell and F. N. Castellano, *Inorg. Chem.*, 2019, **58**, 8750–8762.
- 83 L. D. Ramos, G. Cerchiaro and K. P. Morelli Frin, *Inorganica Chim. Acta*, 2020, **501**, 119329.
- 84 M. Yu. Tyupina, A. E. Miroslavov, G. V. Sidorenko, V. V. Gurzhiy and A. P. Sakhonenkova, *Russ. J. Gen. Chem.*, 2022, **92**, 69–78.
- 85 G. David, P. J. Walsh and K. C. Gordon, *Chem. Phys. Lett.*, 2004, **383**, 292–296.
- 86 C. Fu, M. Li, Z. Su, Z. Hong, W. Li and B. Li, *Appl. Phys. Lett.*, 2006, **88**, 093507.
- 87 M. K. Kuimova, W. Z. Alsindi, A. J. Blake, E. S. Davies, D. J. Lampus, P. Matousek, J. McMaster, A. W. Parker, M. Towrie, X.-Z. Sun, C. Wilson and M. W. George, *Inorg. Chem.*, 2008, **47**, 9857–9869.
- 88 K. Choroba, M. Penkala, J. Palion-Gazda, E. Malicka and B. Machura, *Inorg. Chem.*, 2023, **62**, 19256–19269.
- 89 B.-C. Tzeng, B.-S. Chen, C.-K. Chen, Y.-P. Chang, W.-C. Tzeng, T.-Y. Lin, G.-H. Lee, P.-T. Chou, Y.-J. Fu and A. H.-H. Chang, *Inorg. Chem.*, 2011, **50**, 5379–5388.
- 90 D. A. W. Ross, J. I. Mapley, A. P. Cording, R. A. S. Vasdev, C. J. McAdam, K. C. Gordon and J. D. Crowley, *Inorg. Chem.*, 2021, **60**, 11852–11865.
- 91 J. J. Sutton, D. Preston, P. Traber, J. Steinmetzer, X. Wu, S. Kayal, X.-Z. Sun, J. D. Crowley, M. W. George, S. Kupfer and K. C. Gordon, *J. Am. Chem. Soc.*, 2021, **143**, 9082–9093.
- 92 R. Horvath, M. G. Fraser, S. A. Cameron, A. G. Blackman, P. Wagner, D. L. Officer and K. C. Gordon, *Inorg. Chem.*, 2013, **52**, 1304–1317.
- 93 T. Yu, D. P.-K. Tsang, V. K.-M. Au, W. H. Lam, M.-Y. Chan and V. W.-W. Yam, *Chem. – Eur. J.*, 2013, **19**, 13418–13427.
- 94 Y. Kim, F. W. M. Vanhelfmont, C. L. Stern and J. T. Hupp, *Inorganica Chim. Acta*, 2001, **318**, 53–60.
- 95 T. Klemens, A. Świtlicka, A. Szłapa-Kula, Ł. Łapok, M. Obłozza, M. Siwy, M. Szalkowski, S. Maćkowski, M. Libera, E. Schab-Balcerzak and B. Machura, *Organometallics*, 2019, **38**, 4206–4223.
- 96 G. E. Shillito, T. B. J. Hall, D. Preston, P. Traber, L. Wu, K. E. A. Reynolds, R. Horvath, X. Z. Sun, N. T. Lucas, J. D. Crowley, M. W. George, S. Kupfer and K. C. Gordon, *J. Am. Chem. Soc.*, 2018, **140**, 4534–4542.
- 97 G. E. Shillito, D. Preston, P. Traber, J. Steinmetzer, C. J. McAdam, J. D. Crowley, P. Wagner, S. Kupfer and K. C. Gordon, *Inorg. Chem.*, 2020, **59**, 6736–6746.
- 98 G. E. Shillito, D. Preston, J. D. Crowley, P. Wagner, S. J. Harris, K. C. Gordon and S. Kupfer, *Inorg. Chem.*, 2024, **63**, 4947–4956.
- 99 C. B. Larsen, H. van der Salm, C. A. Clark, A. B. S. Elliott, M. G. Fraser, R. Horvath, N. T. Lucas, X.-Z. Sun, M. W. George and K. C. Gordon, *Inorg. Chem.*, 2014, **53**, 1339–1354.
- 100 C. B. Larsen, H. van der Salm, G. E. Shillito, N. T. Lucas and K. C. Gordon, *Inorg. Chem.*, 2016, **55**, 8446–8458.
- 101 B. S. Adams, G. E. Shillito, H. van der Salm, R. Horvath, C. B. Larsen, X.-Z. Sun, N. T. Lucas, M. W. George and K. C. Gordon, *Inorg. Chem.*, 2017, **56**, 12967–12977.
- 102 J. E. Barnsley, G. E. Shillito, C. B. Larsen, H. van der Salm, R. Horvath, X. Z. Sun, X. Wu, M. W. George, N. T. Lucas and K. C. Gordon, *Inorg. Chem.*, 2019, **58**, 9785–9795.
- 103 A. Szłapa-Kula, J. Palion-Gazda, P. Ledwon, K. Erfurt and B. Machura, *Dalton Trans.*, 2022, **51**, 14466–14481.
- 104 X. Li, G.-W. Zhao, Y.-X. Hu, J.-H. Zhao, Y. Dong, L. Zhou, Y.-L. Lv, H.-J. Chi and Z. Su, *J. Mater. Chem. C*, 2017, **5**, 7629–7636.
- 105 C. Liu, J. Li, B. Li, Z. Hong, F. Zhao, S. Liu and W. Li, *Appl. Phys. Lett.*, 2006, **89**, 243511.
- 106 C. B. Liu, J. Li, B. Li, Z. R. Hong, F. F. Zhao, S. Y. Liu and W. L. Li, *Chem. Phys. Lett.*, 2007, **435**, 54–58.
- 107 G. S. Huff, W. K. C. Lo, R. Horvath, J. O. Turner, X.-Z. Sun, G. R. Weal, H. J. Davidson, A. D. W. Kennedy, C. J. McAdam, J. D. Crowley, M. W. George and K. C. Gordon, *Inorg. Chem.*, 2016, **55**, 12238–12253.
- 108 T. Klemens, A. Świtlicka, A. Szłapa-Kula, S. Krompiec, P. Lodowski, A. Chrobok, M. Godlewska, S. Kotowicz, M. Siwy, K. Bednarczyk, M. Libera, S. Maćkowski, T. Pędziński, E. Schab-Balcerzak and B. Machura, *Appl. Organomet. Chem.*, 2018, **32**, e4611.

- 109 J. Palion-Gazda, A. Szłapa-Kula, M. Penkala, K. Erfurt and B. Machura, *Molecules*, 2022, **27**, 7147.
- 110 R. Fernández-Terán and L. Sévery, *Inorg. Chem.*, 2021, **60**, 1334–1343.
- 111 T. Klemens, A. Świtlicka-Olszewska, B. Machura, M. Grucela, H. Janeczek, E. Schab-Balcerzak, A. Szłapa, S. Kula, S. Krompiec, K. Smolarek, D. Kowalska, S. Mackowski, K. Erfurt and P. Lodowski, *RSC Adv.*, 2016, **6**, 56335–56352.
- 112 J. Palion-Gazda, K. Choroba, M. Penkala, P. Rawicka and B. Machura, *Inorg. Chem.*, 2024, **63**, 1356–1366.
- 113 T. Klemens, A. Świtlicka-Olszewska, B. Machura, M. Grucela, E. Schab-Balcerzak, K. Smolarek, S. Mackowski, A. Szłapa, S. Kula, S. Krompiec, P. Lodowski and A. Chrobok, *Dalton Trans.*, 2016, **45**, 1746–1762.
- 114 J. R. W. McLay, J. J. Sutton, G. E. Shillito, C. B. Larsen, G. S. Huff, N. T. Lucas and K. C. Gordon, *Inorg. Chem.*, 2021, **60**, 130–139.
- 115 J.-X. Wang, H.-Y. Xia, W.-Q. Liu, F. Zhao and Y. Wang, *Inorganica Chim. Acta*, 2013, **394**, 92–97.
- 116 Y.-Q. Li and K.-Z. Wang, *Molecules*, 2023, **28**, 3229.
- 117 X. Su, W.-J. Wang, Q. Cao, H. Zhang, B. Liu, Y. Ling, X. Zhou and Z.-W. Mao, *Angew. Chem. Int. Ed.*, 2022, **61**, e202115800.
- 118 E. J. Rohwer, Y. Geng, M. Akbarimoosavi, L. M. L. Daku, O. Aleveque, E. Levillain, J. Hauser, A. Cannizzo, R. Häner, S. Decurtins, R. J. Stanley, T. Feurer and S.-X. Liu, *Chem. – Eur. J.*, 2021, **27**, 5399–5403.
- 119 D. Hanss and O. S. Wenger, *Inorganica Chim. Acta*, 2009, **362**, 3415–3420.
- 120 N. P. Liyanage, W. Yang, S. Guertin, S. S. Roy, C. A. Carpenter, R. E. Adams, R. H. Schmehl, J. H. Delcamp and J. W. Jurss, *Chem. Commun.*, 2019, **55**, 993–996.
- 121 M. E. Walther and O. S. Wenger, *Dalton Trans.*, 2008, 6311–6318.
- 122 L.-Q. Qiu, K.-H. Chen, Z.-W. Yang and L.-N. He, *Green Chem.*, 2020, **22**, 8614–8622.
- 123 Del Guerso, S. Leroy, F. Fages and R. H. Schmehl, *Inorg. Chem.*, 2002, **41**, 359–366.
- 124 R. Kushwaha, A. Upadhyay, S. Saha, A. K. Yadav, A. Bera, A. Dutta and S. Banerjee, *Dalton Trans.*, 2024, **53**, 13591–13601.
- 125 M. Małecka, A. Szłapa-Kula, A. M. Maroń, P. Ledwon, M. Siwy, E. Schab-Balcerzak, K. Sulowska, S. Maćkowski, K. Erfurt and B. Machura, *Inorg. Chem.*, 2022, **61**, 15070–15084.
- 126 A. Szłapa-Kula, M. Małecka, A. M. Maroń, H. Janeczek, M. Siwy, E. Schab-Balcerzak, M. Szalkowski, S. Maćkowski, T. Pedzinski, K. Erfurt and B. Machura, *Inorg. Chem.*, 2021, **60**, 18726–18738.
- 127 L. T. Babu, U. Das, R. Das, B. Kar and P. Paira, *Dalton Trans.*, 2024, **53**, 5993–6005.
- 128 R. Das and P. Paira, *Dalton Trans.*, 2023, **52**, 15365–15376.
- 129 L.-Q. Qiu, K.-H. Chen, Z.-W. Yang, F.-Y. Ren and L.-N. He, *Chem. – Eur. J.*, 2021, **27**, 15536–15544.
- 130 N. M. Shavaleev, Z. R. Bell, T. L. Easun, R. Rutkaite, L. Swanson and M. D. Ward, *Dalton Trans.*, 2004, 3678–3688.
